# Supplementary material for: Photoactivatable bis(thiosemicarbazone) derivatives for copper-64 radiotracer synthesis
Source: PubMed Central journal article supplement — Dalton Trans. 2022 Mar 9;51(13):5041–52. doi: 10.1039/d2dt00209d (PMC8962981; doi:10.1039/d2dt00209d), 2022-03-09
Supplement: DT-051-D2DT00209D-s001.pdf [file DT-051-D2DT00209D-s001.pdf]

## Electronic Supporting Information (ESI)

### Photoactivatable *bis*(thiosemicarbazone) derivatives for copper-64 radiotracer synthesis

Daniel F. Earley,<sup>†</sup> Jose Esteban Flores,<sup>†</sup> Amaury Guillou, and Jason P. Holland\*

University of Zurich, Department of Chemistry, Winterthurerstrasse 190, CH-8057, Zurich, Switzerland

<sup>†</sup> Authors contributed equally

**\* Corresponding Author:**

Prof. Dr Jason P. Holland

Tel: +41.44.63.53.990

E-mail: [jason.holland@chem.uzh.ch](mailto:jason.holland@chem.uzh.ch)

Website: [www.hollandlab.org](http://www.hollandlab.org)

## Table of Contents

|                                                                                                                      |          |
|----------------------------------------------------------------------------------------------------------------------|----------|
| <b>Synthesis and characterisation data</b> .....                                                                     | <b>5</b> |
| Compound 1 .....                                                                                                     | 5        |
| Compound 2 .....                                                                                                     | 5        |
| Compound 3 .....                                                                                                     | 5        |
| Compound 4 .....                                                                                                     | 6        |
| Compound 5, H <sub>2</sub> ATSM/en-Boc.....                                                                          | 6        |
| Compound 6, H <sub>2</sub> ATSM/en .....                                                                             | 7        |
| Compound 7, H <sub>2</sub> ATSM/en-ArN <sub>3</sub> .....                                                            | 7        |
| Compound 9 .....                                                                                                     | 8        |
| Compound 10 .....                                                                                                    | 9        |
| Compound 11 .....                                                                                                    | 9        |
| Compound 12 .....                                                                                                    | 10       |
| Compound 13 .....                                                                                                    | 10       |
| Compound 8, H <sub>2</sub> ATSM-PEG <sub>3</sub> -ArN <sub>3</sub> .....                                             | 11       |
| Metalation of compounds 6, 7 and 8.....                                                                              | 11       |
| Zn-6.....                                                                                                            | 11       |
| Cu-6.....                                                                                                            | 12       |
| Zn-7.....                                                                                                            | 12       |
| Cu-7.....                                                                                                            | 12       |
| Cu-8.....                                                                                                            | 13       |
| Figure S1. <sup>1</sup> H NMR (400 MHz, CDCl <sub>3</sub> , 298 K) spectrum of compound 2 .....                      | 14       |
| Figure S2. <sup>13</sup> C{ <sup>1</sup> H} NMR (101 MHz, CDCl <sub>3</sub> , 298 K) spectrum of compound 2.....     | 14       |
| Figure S3. HR-ESI-MS spectrum of compound 2 .....                                                                    | 14       |
| Figure S4. <sup>1</sup> H NMR (400 MHz, CDCl <sub>3</sub> , 298 K) spectrum of compound 3 .....                      | 15       |
| Figure S5. <sup>13</sup> C{ <sup>1</sup> H} NMR (101 MHz, CDCl <sub>3</sub> , 298 K) spectrum of compound 3.....     | 15       |
| Figure S6. HR-ESI-MS spectrum of compound 3 .....                                                                    | 15       |
| Figure S7. <sup>1</sup> H NMR (400 MHz, DMSO-d <sub>6</sub> , 298 K) spectrum of compound 4.....                     | 16       |
| Figure S8. <sup>13</sup> C{ <sup>1</sup> H} NMR (101 MHz, DMSO-d <sub>6</sub> , 298 K) spectrum of compound 4 .....  | 16       |
| Figure S9. HR-ESI-MS spectrum of compound 4 .....                                                                    | 16       |
| Figure S10. <sup>1</sup> H NMR (400 MHz, DMSO-d <sub>6</sub> , 298 K) spectrum of compound 5 .....                   | 17       |
| Figure S11. <sup>13</sup> C{ <sup>1</sup> H} NMR (101 MHz, DMSO-d <sub>6</sub> , 298 K) spectrum of compound 5 ..... | 17       |
| Figure S12. HR-ESI-MS spectrum of compound 5 .....                                                                   | 17       |
| Figure S13. <sup>1</sup> H NMR (400 MHz, DMSO-d <sub>6</sub> , 298 K) spectrum of compound 6.....                    | 18       |
| Figure S14. <sup>13</sup> C{ <sup>1</sup> H} NMR (101 MHz, DMSO-d <sub>6</sub> , 298 K) spectrum of compound 6 ..... | 18       |
| Figure S15. HR-ESI-MS spectrum of compound 6 .....                                                                   | 18       |
| Figure S16. <sup>1</sup> H NMR (500 MHz, DMSO-d <sub>6</sub> , 298 K) spectrum of compound 7.....                    | 19       |

|                                                                                                                                                                                                            |           |
|------------------------------------------------------------------------------------------------------------------------------------------------------------------------------------------------------------|-----------|
| Figure S17. $^{13}\text{C}\{^1\text{H}\}$ NMR (126 MHz, DMSO- $d_6$ , 298 K) spectrum of compound <b>7</b> .....                                                                                           | 19        |
| Figure S18. HR-ESI-MS spectrum of compound <b>7</b> .....                                                                                                                                                  | 19        |
| Figure S19. $^1\text{H}$ COSY NMR (400 MHz, DMSO- $d_6$ , 298 K) spectrum of compound <b>7</b> .....                                                                                                       | 20        |
| Figure S20. $^1\text{H}-^{13}\text{C}\{^1\text{H}\}$ HSQC NMR (400 MHz, DMSO- $d_6$ , 298 K) spectrum of compound <b>7</b> ...                                                                             | 20        |
| Figure S21. $^1\text{H}$ NMR (400 MHz, MeOD, 298 K) spectrum of compound <b>8</b> .....                                                                                                                    | 21        |
| Figure S22. $^{13}\text{C}\{^1\text{H}\}$ NMR (101 MHz, MeOD, 298 K) spectrum of compound <b>8</b> .....                                                                                                   | 21        |
| Figure S23. HR-ESI-MS spectrum of compound <b>8</b> .....                                                                                                                                                  | 21        |
| Figure S24. $^1\text{H}$ COSY NMR (400 MHz, MeOD, 298 K) spectrum of compound <b>8</b> .....                                                                                                               | 22        |
| Figure S25. $^1\text{H}-^{13}\text{C}\{^1\text{H}\}$ HSQC NMR (400 MHz, MeOD, 298 K) spectrum of compound <b>8</b> .....                                                                                   | 22        |
| Figure S26. $^1\text{H}$ NMR (400 MHz, $\text{CDCl}_3$ , 298 K) spectrum of compound <b>9</b> .....                                                                                                        | 23        |
| Figure S27. $^{13}\text{C}\{^1\text{H}\}$ NMR (101 MHz, $\text{CDCl}_3$ , 298 K) spectrum of compound <b>9</b> .....                                                                                       | 23        |
| Figure S28. HR-ESI-MS spectrum of compound <b>9</b> .....                                                                                                                                                  | 23        |
| Figure S29. $^1\text{H}$ NMR (500 MHz, $\text{CDCl}_3$ , 298 K) spectrum of compound <b>10</b> .....                                                                                                       | 24        |
| Figure S30. $^{13}\text{C}\{^1\text{H}\}$ NMR (126 MHz, $\text{CDCl}_3$ , 298 K) spectrum of compound <b>10</b> .....                                                                                      | 24        |
| Figure S31. HR-ESI-MS spectrum of compound <b>10</b> .....                                                                                                                                                 | 24        |
| Figure S32. $^1\text{H}$ NMR (400 MHz, $\text{CDCl}_3$ , 298 K) spectrum of compound <b>11</b> .....                                                                                                       | 25        |
| Figure S33. $^{13}\text{C}\{^1\text{H}\}$ NMR (101 MHz, $\text{CDCl}_3$ , 298 K) spectrum of compound <b>11</b> .....                                                                                      | 25        |
| Figure S34. HR-ESI-MS spectrum of compound <b>11</b> .....                                                                                                                                                 | 25        |
| Figure S35. $^1\text{H}$ NMR (400 MHz, DMSO- $d_6$ , 298 K) spectrum of compound <b>12</b> .....                                                                                                           | 26        |
| Figure S36. $^{13}\text{C}\{^1\text{H}\}$ NMR (101 MHz, DMSO- $d_6$ , 298 K) spectrum of compound <b>12</b> .....                                                                                          | 26        |
| Figure S37. HR-ESI-MS spectrum of compound <b>12</b> .....                                                                                                                                                 | 26        |
| Figure S38. $^1\text{H}$ NMR (400 MHz, DMSO- $d_6$ , 298 K) spectrum of compound <b>13</b> .....                                                                                                           | 27        |
| Figure S39. $^{13}\text{C}\{^1\text{H}\}$ NMR (101 MHz, DMSO- $d_6$ , 298 K) spectrum of compound <b>13</b> .....                                                                                          | 27        |
| Figure S40. HR-ESI-MS spectrum of compound <b>13</b> .....                                                                                                                                                 | 27        |
| Figure S41. HR-ESI-MS spectrum of compound Zn- <b>6</b> .....                                                                                                                                              | 28        |
| Figure S42. HR-ESI-MS spectrum of compound Cu- <b>6</b> .....                                                                                                                                              | 28        |
| Figure S43. HR-ESI-MS spectrum of compound Zn- <b>7</b> .....                                                                                                                                              | 28        |
| Figure S44. HR-ESI-MS spectrum of compound Cu- <b>7</b> .....                                                                                                                                              | 29        |
| Figure S45. HR-ESI-MS spectrum of compound Zn- <b>8</b> .....                                                                                                                                              | 29        |
| Figure S46. HR-ESI-MS spectrum of compound Cu- <b>8</b> .....                                                                                                                                              | 29        |
| <b>Photochemical activation</b> .....                                                                                                                                                                      | <b>30</b> |
| Figure S47. Irradiation stability for compound <b>6</b> and corresponding Zn- <b>6</b> and Cu- <b>6</b> complexes....                                                                                      | 30        |
| Figure S48. Photochemical degradation of compound <b>8</b> and Cu- <b>8</b> .....                                                                                                                          | 30        |
| Figure S49. Photochemical activation kinetics measured by HPLC analysis during the photolysis of solutions of $\text{H}_2\text{ATSM/en-ArN}_3$ ( <b>7</b> ) and Cu- <b>7</b> in $\text{H}_2\text{O}$ ..... | 31        |
| Figure S50. Photochemical activation kinetics measured by HPLC analysis during the photolysis of solutions of $\text{H}_2\text{ATSM/en-ArN}_3$ ( <b>7</b> ) and Cu- <b>7</b> in DMF .....                  | 32        |

|                                                                                                                                                                                                                    |           |
|--------------------------------------------------------------------------------------------------------------------------------------------------------------------------------------------------------------------|-----------|
| Figure S51. Photochemical activation kinetics measured by HPLC analysis during the photolysis of solutions of H <sub>2</sub> ATSM/en-PEG <sub>3</sub> -ArN <sub>3</sub> ( <b>8</b> ) and Cu- <b>8</b> in EtOH..... | 33        |
| <b><i><sup>64</sup>Cu-Radiolabelling of H<sub>2</sub>ATSM/en-ArN<sub>3</sub> derivatives .....</i></b>                                                                                                             | <b>34</b> |
| Figure S52. Radiochemical characterisation of [ <sup>64</sup> Cu]Cu- <b>8</b> .....                                                                                                                                | 34        |
| Figure S53. Radiochemical characterisation data of the [ <sup>64</sup> Cu]Cu-labelled protein conjugate [ <sup>64</sup> Cu]CuATSM/en-azepin-HSA <i>via</i> direct synthesis .....                                  | 35        |
| Figure S54. Radiochemical characterisation data of the [ <sup>64</sup> Cu]Cu-labelled protein conjugate [ <sup>64</sup> Cu]CuATSM/en-PEG <sub>3</sub> -azepin-HSA <i>via</i> direct synthesis .....                | 35        |

## Synthesis and characterisation data

### Compound 1

To a cooled (0 °C) solution of ethylenediamine (4.59 mL; 68.5 mmol; 0.25 M) in CHCl<sub>3</sub> (275 mL) was added dropwise a solution of di-*tert*-butyl dicarbonate (Boc<sub>2</sub>O; 2.99 g; 13.7 mmol, 0.5 M) in CHCl<sub>3</sub> (27.5 mL) over period of 2 h. The reaction mixture was allowed to warm to rt and stirred for a further 3 h. After this time, the reaction mixture was filtered and concentrated under reduced pressure. The crude residue was dissolved in EtOAc (400 mL), washed with brine (3 × 150 mL), dried over MgSO<sub>4</sub> and concentrated *in vacuo*. The crude product was purified by column chromatography (SiO<sub>2</sub>; DCM:MeOH; 9:1 (v:v) + 1% NH<sub>3</sub>OH) to afford compound **1** (1.95 g; 89% yield) as a colourless oil.  $R_f = 0.31$  (DCM:MeOH; 9:1); <sup>1</sup>H NMR (400 MHz, CDCl<sub>3</sub>, 298 K): δ (ppm) 4.86 (1H, br s, NH), 3.17 (2H, m, CH<sub>2</sub>), 2.80 (2H, t, <sup>3</sup>J<sub>HH</sub> = 6.0 Hz, CH<sub>2</sub>) 1.44 (9H, s, C(CH<sub>3</sub>)<sub>3</sub>), 1.36 (2H, s, NH<sub>2</sub>).

### Compound 2

To a stirred solution of compound **1** (1.43 g; 8.9 mmol; 1 equiv) and triethylamine (1.25 mL; 8.9 mmol; 1 equiv) in EtOH (30 mL) was added CS<sub>2</sub> (0.54 mL; 8.9 mmol; 1 equiv) dropwise, whilst maintaining the reaction at rt. After 2 h, methyl iodide (0.56 mL, 8.9 mmol; 1 equiv) was added and the resulting mixture was stirred for a further 2 h. After this time, the solvent was removed under reduced pressure and the resulting residue was suspended in EtOAc (30 mL), washed with 1 M aq HCl (30 mL), sat aq NaHCO<sub>3</sub> (30 mL), H<sub>2</sub>O (30 mL) and brine (30 mL), dried over MgSO<sub>4</sub> and concentrated *in vacuo* to furnish compound **2** (2.03 g; 91% yield) as an off-white solid. <sup>1</sup>H NMR (400 MHz, CDCl<sub>3</sub>, 298 K): δ (ppm) 8.32 (1H, br s, NHC=S), 4.98 (1H, br s, CH<sub>2</sub>NHC=S), 3.79 (2H, q, <sup>3</sup>J<sub>HH</sub> = 4.9 Hz, NHC=O), 3.42 (2H, t,  $J = 5.4$  Hz, CH<sub>2</sub>NHC=O), 2.59 (3H, s, SCH<sub>3</sub>), 1.45 (9H, s, C(CH<sub>3</sub>)<sub>3</sub>). <sup>13</sup>C{<sup>1</sup>H} NMR (101 MHz, CDCl<sub>3</sub>, 298 K): δ (ppm) 199.3 (C=S), 157.8 (C=O), 80.7 (C(CH<sub>3</sub>)<sub>3</sub>), 49.7 (CH<sub>2</sub>NHC=S), 39.2 (CH<sub>2</sub>NHC=O), 28.5 (C(CH<sub>3</sub>)<sub>3</sub>), 18.1 (SCH<sub>3</sub>) ppm. HR-ESI-MS (ESI+):  $m/z$  calcd. for C<sub>9</sub>H<sub>18</sub>N<sub>2</sub>O<sub>2</sub>S<sub>2</sub> [M+H]<sup>+</sup> 251.08825, found 251.08808, [M+Na]<sup>+</sup> 273.07019, found 273.06992.

### Compound 3

To a solution of compound **2** (2.03 g; 8.11 mmol; 1 equiv) in EtOH (30 mL) was added hydrazine hydrate (0.57 mL; 11.4 mmol; 1.4 equiv) and the reaction stirred under reflux for 3 h. After this time, the solvent was removed under reduced pressure and the resulting white

residue was dissolved in  $\text{CHCl}_3$  (20 mL). This solution was loaded on a plug of silica, washed with  $\text{CHCl}_3$  (20 mL) and then eluted with MeOH (30 mL). The MeOH fraction was then concentrated *in vacuo* to afford compound **3** (1.79 g; 94% yield) as a colourless oil, which solidified over a few days.  $^1\text{H NMR}$  (400 MHz,  $\text{CDCl}_3$ , 298 K):  $\delta$  (ppm) 7.80 (1H, br s,  $\text{NHNH}_2$ ), 7.63 (1H, br s,  $\text{CH}_2\text{NHC}=\text{S}$ ), 5.03 (1H, br s,  $\text{NHCO}_2\text{C}(\text{CH}_3)_3$ ), 3.82 (2H, br s,  $\text{NHNH}_2$ ), 3.75 (2H, q,  $^3J_{\text{HH}} = 5.8$  Hz,  $\text{CH}_2\text{NHC}=\text{S}$ ), 3.37 (2H, q,  $^3J_{\text{HH}} = 6.0$  Hz,  $\text{CH}_2\text{NHCO}_2\text{C}(\text{CH}_3)_3$ ), 1.43 (9H, s,  $\text{C}(\text{CH}_3)_3$ ).  $^{13}\text{C}\{^1\text{H}\}$  NMR (101 MHz,  $\text{CDCl}_3$ , 298 K):  $\delta$  (ppm) 183.0 (C=S), 153.8 (C=O), 79.8 ( $\text{C}(\text{CH}_3)_3$ ), 44.7 ( $\text{CH}_2\text{NHC}=\text{S}$ ), 40.3 ( $\text{CH}_2\text{NHC}=\text{O}$ ), 28.5 ( $\text{C}(\text{CH}_3)_3$ ). **HR-ESI-MS** (ESI+):  $m/z$  calcd. for  $\text{C}_9\text{H}_{18}\text{N}_4\text{O}_2\text{S}$   $[\text{M}+\text{H}]^+$  235.12239, found 235.12232.

#### Compound 4

A cooled (0 °C) solution of 4-methylthiosemicarbazide (2.00 g; 19 mmol; 1 equiv) in  $\text{H}_2\text{O}$  (100 mL) was acidified with conc aq HCl (~700  $\mu\text{L}$ ; 12.5 M), to which diacetyl (2,3-butanedione; 10.8 mL; 124 mmol; 6.5 equiv) was added rapidly. A suspension was formed instantly and stirring was continued for 1 h. After this time, the reaction mixture was filtered and the resulting solid was washed with  $\text{H}_2\text{O}$  ( $5 \times 20$  mL) and dried under high-vacuum to furnish compound **4** (2.50 g; 76% yield) as a white solid.  $^1\text{H NMR}$  (300 MHz,  $\text{DMSO-d}_6$ , 298 K):  $\delta$  (ppm) 10.64 (1H, br s,  $\text{C}=\text{SNHN}$ ), 8.62 (1H, m,  $\text{CH}_3\text{NHC}=\text{S}$ ), 3.05 (3H, d,  $^3J_{\text{HH}} = 4.5$  Hz,  $\text{CH}_3\text{NHC}=\text{S}$ ), 2.42 (3H, s,  $\text{CH}_3\text{C}=\text{O}$ ), 1.96 (3H, s,  $\text{CH}_3\text{C}=\text{N}$ ).  $^{13}\text{C}\{^1\text{H}\}$  NMR (126 MHz,  $\text{DMSO-d}_6$ , 298 K):  $\delta$  (ppm) 198.0 (C=O), 179.5 (C=S), 146.0 (C=N), 31.9 ( $\text{CH}_3\text{NHC}=\text{S}$ ), 25.2 ( $\text{CH}_3\text{C}=\text{O}$ ), 10.5 ( $\text{CH}_3\text{C}=\text{N}$ ). **HR-ESI-MS** (ESI-):  $m/z$  calcd. for  $\text{C}_7\text{H}_{13}\text{N}_3\text{OS}$   $[\text{M}-\text{H}]^-$  172.05501, found 172.05499.

#### Compound 5, H<sub>2</sub>ATSM/en-Boc

To a stirred suspension of compound **4** (183 mg; 0.8 mmol; 1 equiv) in EtOH (33 mL) at 50 °C was added compound **3** (135 mg; 0.8 mmol; 1 equiv) portion-wise over 30 min. After this time, the reaction mixture was acidified with conc aq HCl (~100  $\mu\text{L}$ ; 12.5 M) and the reaction was stirred under reflux for 5 h. After this time, the reaction mixture was allowed to cool to rt and was poured into cold water (20 mL) to produce a white precipitate. The precipitate was then collected by vacuum filtration, washed with  $\text{H}_2\text{O}$  ( $2 \times 10$  mL),  $\text{Et}_2\text{O}$  (5 mL) and dried under reduced pressure to afford H<sub>2</sub>ATSM/en-Boc, compound **5** (254 mg; 83% yield) as an off-white solid.  $^1\text{H NMR}$  (400 MHz,  $\text{DMSO-d}_6$ , 298 K):  $\delta$  (ppm) 10.28 (2H, br s, 2 x  $\text{NHN}=\text{C}$ ), 8.45

(1H, t,  $^3J_{\text{HH}} = 5.0$  Hz,  $\text{CH}_2\text{NHC}=\text{S}$ ), 8.38 (1H, q,  $^3J_{\text{HH}} = 4.5$  Hz,  $\text{CH}_3\text{NHC}=\text{S}$ ), 7.03 (1H, t,  $^3J_{\text{HH}} = 5.0$  Hz,  $\text{NHCO}_2\text{C}(\text{CH}_3)_3$ ), 3.59 (2H, td,  $^3J_{\text{HH}} = 5.5, 5.0$  Hz,  $\text{CH}_2\text{NHC}=\text{S}$ ), 3.18 (2H, td,  $^3J_{\text{HH}} = 5.5, 5.0$  Hz,  $\text{CH}_2\text{NHCO}_2\text{C}(\text{CH}_3)_3$ ), 3.02 (3H, d,  $^3J_{\text{HH}} = 4.5$  Hz,  $\text{CH}_3\text{NHC}=\text{S}$ ), 2.23 (3H, s,  $\text{CH}_3\text{C}=\text{N}$ ), 2.21 (3H, s,  $\text{CH}_3\text{C}=\text{N}$ ), 1.36 (9H, s,  $\text{C}(\text{CH}_3)_3$ ).  $^{13}\text{C}\{^1\text{H}\}$  NMR (101 MHz, DMSO- $d_6$ , 298 K):  $\delta$  (ppm) 178.5 (C=S), 178.0 (C=S), 156.2 (C=O), 148.3 ( $\text{CH}_3\text{C}=\text{N}$ ), 148.0 ( $\text{CH}_3\text{C}=\text{N}$ ), 77.9 ( $\text{C}(\text{CH}_3)_3$ ), 44.4 ( $\text{CCH}_2$ ), [39.1 ( $\text{CCH}_2$ ) from DEPT-135 spectrum – see inset], 31.2 ( $\text{SCH}_3$ ), 28.2 ( $\text{C}(\text{CH}_3)_3$ ), 11.7 ( $\text{CH}_3\text{C}=\text{N}$ ), 11.7 ( $\text{CH}_3\text{C}=\text{N}$ ). **HR-ESI-MS** (ESI+):  $m/z$  calcd. for  $\text{C}_{14}\text{H}_{27}\text{N}_7\text{O}_2\text{S}_2$   $[\text{M}+\text{H}]^+$  390.17404, found 390.17412,  $[\text{M}+\text{Na}]^+$  412.15599, found 412.15611.

### Compound 6, H<sub>2</sub>ATSM/en

H<sub>2</sub>ATSM/en-Boc, compound **5** (222 mg; 0.6 mmol; 1 equiv) was treated with TFA (3 mL; 22 mmol; 36 equiv) and the resulting colourless solution was stirred at rt for 2 h. After this time, the solvent was removed under reduced pressure and sat. aq NaHCO<sub>3</sub> (3 mL) was added slowly to produce a white suspension. After 20 min of stirring at rt the solid was collected by vacuum filtration and washed with H<sub>2</sub>O (3 × 10 mL), Et<sub>2</sub>O (2 × 10 mL) and dried under reduced pressure to furnish the TFA salt of H<sub>2</sub>ATSM/en, compound **6** (126 mg; 76% yield) as an off-white solid.  $^1\text{H}$  NMR (400 MHz, DMSO- $d_6$ , 298 K):  $\delta$  (ppm) 10.19 (1H, br s,  $\text{NH}=\text{C}$ ), 8.44 (1H, br s,  $\text{CH}_3\text{NHC}=\text{S}$ ), 8.35 (1H, br s,  $\text{CH}_2\text{NHC}=\text{S}$ ), 7.78 (3H, br s,  $\text{NH}_3^+$ ), 3.38 (2H, br s,  $\text{CH}_2\text{NHC}=\text{S}$ ), 3.01 (5H,  $\text{CH}_3\text{NHC}=\text{S}$  and  $\text{CH}_2\text{NH}_3^+$ ), 2.22 (6H, br s, 2 ×  $\text{CH}_3\text{C}=\text{N}$ ).  $^{13}\text{C}\{^1\text{H}\}$  NMR (101 MHz, DMSO- $d_6$ , 298 K):  $\delta$  (ppm) 178.5 (C=S), 177.7 (C=S), 148.0 ( $\text{CH}_3\text{C}=\text{N}$ ), 147.7 ( $\text{CH}_3\text{C}=\text{N}$ ), 46.2 ( $\text{CCH}_2$ ), 40.3 ( $\text{CCH}_2$ ), 31.2 ( $\text{CH}_3\text{NHC}=\text{S}$ ), 11.7 ( $\text{CH}_3\text{C}=\text{N}$ ), 11.7 ( $\text{CH}_3\text{C}=\text{N}$ ). **Reverse-phase HPLC**:  $R_t$  7.28 min. Method: 0.9 mL/min (MeCN/H<sub>2</sub>O with 0.1%TFA): start 30% MeCN, hold until 1 min, gradient to 95% MeCN at 15 min, hold until 17 min. **HR-ESI-MS** (ESI+):  $m/z$  calcd. for  $\text{C}_9\text{H}_{19}\text{N}_7\text{S}_2$   $[\text{M}+\text{H}]^+$  290.12161, found 290.12136.

### Compound 7, H<sub>2</sub>ATSM/en-ArN<sub>3</sub>

4-Azidobenzoic acid (16 mg; 0.1 mmol; 1.3 equiv) and BOP (41 mg; 0.1 mmol; 1.3 equiv) were added to a solution of H<sub>2</sub>ATSM/en, compound **6** (21.3 mg; 0.074 mmol) in anhydrous DMF (3 mL), followed by the addition of DIPEA (20  $\mu\text{L}$ ; 0.14 mmol; 2 equiv) in the dark and the reaction mixture was stirred at rt for 12 h. After this time, H<sub>2</sub>O (10 mL) was added and the resulting precipitate was filtered, washed with H<sub>2</sub>O (3 × 5 mL), EtOH (3 mL) and Et<sub>2</sub>O (2 × 5 mL), and dried under high-vacuum to furnish H<sub>2</sub>ATSM/en-ArN<sub>3</sub>, compound **7** (23 mg;

56% yield) as an off-white solid.  $^1\text{H NMR}$  (500 MHz, DMSO- $d_6$ , 298 K):  $\delta$  (ppm) 10.30 (1H, br s,  $\text{NHC}=\text{N}$ ), 10.22 (1H, br s,  $\text{NHC}=\text{N}$ ), 8.71 (1H, t,  $^3J_{\text{HH}} = 5.0$  Hz,  $\text{CH}_2\text{NHC}=\text{S}$ ), 8.59 (1H, t,  $^3J_{\text{HH}} = 5.0$  Hz,  $\text{NHC}=\text{O}$ ), 8.38 (1H, q,  $^3J_{\text{HH}} = 4.5$  Hz,  $\text{CH}_3\text{NHC}=\text{S}$ ), 7.90 (2H, d, 8.5 Hz, Ar-CH) 7.20 (2H, d, 8.5 Hz, Ar-CH), 3.75 (2H, q,  $^3J_{\text{HH}} = 6.5$  Hz,  $\text{CH}_2\text{NHC}=\text{S}$ ) 3.52 (2H, q,  $^3J_{\text{HH}} = 6.5$  Hz,  $\text{CH}_2\text{NHC}=\text{S}$ ), 3.02 (3H, d,  $^3J_{\text{HH}} = 4.5$  Hz,  $\text{CH}_3\text{NHC}=\text{S}$ ), 2.22 (3H, s,  $\text{CH}_3\text{C}=\text{N}$ ), 2.21 (3H, s,  $\text{CH}_3\text{C}=\text{N}$ ).  $^{13}\text{C}\{^1\text{H}\}$  NMR (126 MHz, DMSO- $d_6$ , 298 K):  $\delta$  (ppm) 178.5 (C=S), 178.1 (C=S), 166.0 (C=O), 148.4 (C=N), 148.0 (C=N), 142.3 (Ar- $\text{C}_q$ ), 131.2 (Ar-CH), 130.7 (Ar- $\text{C}_q$ ), 129.2 (Ar-CH), 119.2 (Ar-CH), 118.9 (Ar-CH), 44.3 ( $\text{CH}_2$ ), 38.7 ( $\text{CH}_2$ ), 31.2 ( $\text{CH}_3\text{NH}$ ), 11.8 ( $\text{CH}_3\text{C}=\text{N}$ ), 11.6 ( $\text{CH}_3\text{C}=\text{N}$ ). **Reverse-phase HPLC**:  $R_t$  9.62 min. Method: 0.9 mL/min (MeCN/ $\text{H}_2\text{O}$  with 0.1%TFA): start 30% MeCN, hold until 1 min, gradient to 95% MeCN at 15 min, hold until 17 min. **HR-ESI-MS** (ESI+):  $m/z$  calcd. for  $\text{C}_{16}\text{H}_{22}\text{N}_{10}\text{OS}_2$   $[\text{M}+\text{H}]^+$  457.13090, found 457.13103.

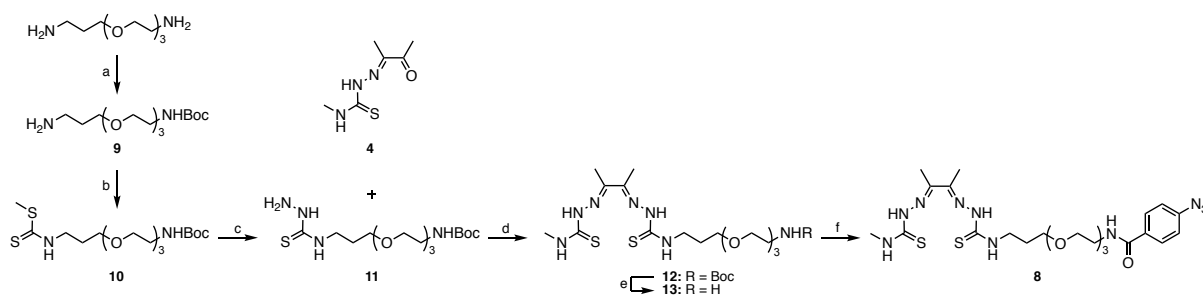

**Scheme S1.** Synthesis of ATSM-PEG<sub>3</sub>-ArN<sub>3</sub>, compound **8**. *Reagents and conditions*: a) Boc<sub>2</sub>O, CH<sub>2</sub>Cl<sub>2</sub>, rt, 16 h (70% yield); b) CS<sub>2</sub>, Et<sub>3</sub>N, methyl iodide, EtOH, rt, 4 h (84% yield); c) H<sub>2</sub>NNH<sub>2</sub>·H<sub>2</sub>O, EtOH, reflux, 3 h (96% yield); d) 3 M aq HCl, EtOH, reflux, 5 h (32% yield); f) TFA, CH<sub>2</sub>Cl<sub>2</sub>, rt, 2 h (80% yield); g) 4-azidobenzoic acid, HATU, DIPEA, DMF, rt, 16 h (20% yield).

## Compound 9

4,7,10-Trioxa-1,13-tridecanediamine (6.06 g; 26.7 mmol; 1.6 equiv) was dissolved in CH<sub>2</sub>Cl<sub>2</sub> (240 mL) to which a prepared solution of di-*tert*-butyl dicarbonate (3.80 g; 16.9 mmol; 1 equiv) in CH<sub>2</sub>Cl<sub>2</sub> (60 mL) was added dropwise over 3 h. The reaction mixture was then stirred at rt for 16 h. After this time, the reaction mixture was washed with sat aq NaHCO<sub>3</sub> (3 × 100 mL) and concentrated under reduced pressure to afford compound **9** (3.78 g; 70% yield) as a colourless oil.  $^1\text{H NMR}$  (400 MHz, CDCl<sub>3</sub>, 298 K):  $\delta$  (ppm) 3.50 – 3.67 (9H, m,  $\text{CH}_2$ ), 3.22 (2H, q,  $^3J_{\text{HH}} = 6.4$  Hz,  $\text{CH}_2$ ), 2.83 (1H, t,  $^3J_{\text{HH}} = 6.6$  Hz,  $\text{CH}_2$ ), 1.94 (1H, s,  $\text{CH}_2$ ), 1.75 (3H, p,  $^3J_{\text{HH}} = 6.3$  Hz,  $\text{CH}_2$ ), 1.43 (9H, s, C(CH<sub>3</sub>)<sub>3</sub>).  $^{13}\text{C}\{^1\text{H}\}$  NMR (101 MHz, CDCl<sub>3</sub>, 298 K):  $\delta$  (ppm) 156.2 (C=O), 79.1 (C(CH<sub>3</sub>)<sub>3</sub>) 70.7 ( $\text{CH}_2$ ), 70.7 ( $\text{CH}_2$ ), 70.7 ( $\text{CH}_2$ ), 70.4 ( $\text{CH}_2$ ), 70.3 ( $\text{CH}_2$ ), 70.3 ( $\text{CH}_2$ ), 69.7 ( $\text{CH}_2$ ), 69.6 ( $\text{CH}_2$ ), 39.8 ( $\text{CH}_2$ ), 29.8 ( $\text{CH}_2$ ), 28.6 (C(CH<sub>3</sub>)<sub>3</sub>). **HR-ESI-MS** (ESI+):



$m/z$  calcd. for  $C_{15}H_{32}N_2O_5$   $[M+H]^+$  321.2384, found 321.2386.

### Compound 10

To a solution of compound **9** (3.6 g; 11.2 mmol; 1 equiv) in EtOH (100 mL) was added  $CS_2$  (0.8 mL; 13 mmol; 1.2 equiv) dropwise, followed by  $Et_3N$  (1.9 mL; 13.4 mmol; 1.2 equiv) and the reaction stirred at rt. After 1.5 h, methyl iodide (1.9 mL, 13.4 mmol; 1.2 equiv) was added and stirred for a further 2 h. Then, the reaction mixture was concentrated under reduced pressure and the crude residue was suspended in EtOAc (100 mL) and washed with 1 M aq HCl (100 mL), sat aq  $NaHCO_3$  solution (100 mL) and  $H_2O$  (100 mL), dried over  $MgSO_4$  and concentrated under reduced pressure to furnish compound **10** (3.80 g; 84% yield) as a pale-yellow oil.  $^1H$  NMR (400 MHz,  $CDCl_3$ , 298 K):  $\delta$  (ppm) 8.52 – 8.09 (1H, m,  $CH_2NHC=S$ ), 4.94 (1H, s,  $NHCO_2C(CH_3)_3$ ), 3.85 (1H, q,  $^3J_{HH} = 5.6$  Hz,  $CH_2$ ), 3.69 – 3.56 (7H, m,  $CH_2$ ), 3.53 (2H, t,  $^3J_{HH} = 6.0$  Hz,  $CH_2$ ), 3.21 (2H, t,  $^3J_{HH} = 6.4$  Hz,  $CH_2$ ), 2.59 (1H, s,  $SCH_3$ ), 1.92 (1H, p,  $^3J_{HH} = 5.7$  Hz,  $CH_2-\beta N$ ), 1.74 (2H, td,  $^3J_{HH} = 6.3, 2.3$  Hz,  $CH_2-\beta N$ ), 1.43 (9H, s,  $C(CH_3)_3$ ).  $^{13}C\{^1H\}$  NMR (101 MHz,  $CDCl_3$ , 298 K):  $\delta$  (ppm) 198.2 (C=S), 156.2 (C=O), 79.1 ( $C(CH_3)_3$ ), 70.7 ( $CH_2$ ), 70.7 ( $CH_2$ ), 70.5 ( $CH_2$ ), 70.5 ( $CH_2$ ), 70.4 ( $CH_2$ ), 69.7 ( $CH_2$ ), 46.8 ( $CH_2-\alpha NHC=S$ ), 38.8 ( $CH_2-\alpha NHC=O$ ), 29.8 ( $CH_2-\beta N$ ), 28.6 ( $C(CH_3)_3$ ), 27.7 ( $CH_2-\beta N$ ), 18.0 ( $SCH_3$ ). HR-ESI-MS (ESI+):  $m/z$  calcd. for  $C_{17}H_{34}N_2O_5S_2$   $[M+H]^+$  411.1982, found 411.1974;  $[M+Na]^+$  433.1801, found 433.1792.

### Compound 11

To a solution of compound **10** (3.8 g; 9.25 mmol; 1 equiv) in EtOH (100 mL) was added hydrazine hydrate (1.90 mL; 13.9 mmol; 1.5 equiv) and the mixture was stirred under reflux for 3 h. After this time, the solvent was removed under reduced pressure and the crude residue was dissolved in  $CHCl_3$  (20 mL). This solution was loaded on a plug of silica, washed with  $CHCl_3$  (20 mL) and the product was eluted with MeOH (30 mL). The MeOH fraction was then concentrated *in vacuo* to afford compound **11** (3.5 g; 96% yield) as a pale-yellow oil.  $^1H$  NMR (400 MHz,  $CDCl_3$ , 298 K):  $\delta$  (ppm) 7.88 (1H, s,  $CH_2NHC=S$ ), 7.21 (1H, s,  $NHC=SNHNH_2$ ), 4.99 (1H, s,  $NHCO_2C(CH_3)_3$ ), 3.89 (1H, s,  $NHC=SNHNH_2$ ), 3.75 (1H, q,  $^3J_{HH} = 5.9$  Hz,  $CH_2-\alpha N$ ), 3.62 (7H, ddt,  $^3J_{HH} = 15.9, 10.3, 4.2$  Hz,  $CH_2$ ), 3.53 (2H, q,  $^3J_{HH} = 6.0$  Hz,  $CH_2$ ), 3.21 (2H, p,  $^3J_{HH} = 6.4$  Hz,  $CH_2$ ), 1.89 (1H, p,  $^3J_{HH} = 5.9$  Hz,  $CH_2-\beta N$ ), 1.75 (2H, p,  $^3J_{HH} = 6.5$  Hz,  $CH_2-\beta N$ ), 1.43 (9H, s,  $C(CH_3)_3$ ). HR-ESI-MS (ESI+):  $m/z$  calcd. for  $C_{16}H_{34}N_4O_5S$   $[M+H]^+$  395.2323, found 395.2325.

## Compound 12

To a suspension of compound **11** (1.70 g; 4.3 mmol; 1 equiv) was suspended in EtOH (50 mL) at 50 °C was added compound **4** (0.75 g; 4.3 mmol; 1 equiv) was added portions-wise over 1 h. After this time, the reaction mixture was acidified with 3 M aq HCl and stirred under reflux for 4 h. After this time, the reaction mixture was allowed to cool to rt and was poured into cold water (100 mL) to produce a white precipitate. The precipitate was then collected by vacuum filtration, washed with water (3 × 50 mL) and Et<sub>2</sub>O (3 × 50 mL), and dried under high vacuum to furnish compound **12** (0.76 g; 32% yield) as a white solid. **<sup>1</sup>H NMR** (400 MHz, DMSO-d<sub>6</sub>, 298 K): δ = 10.18 (1H, s, NHN=C), 8.44 – 8.34 (2H, m, CH<sub>2</sub>NHC=S, CH<sub>3</sub>NHC=S), 6.73 (1H, t, <sup>3</sup>J<sub>HH</sub> = 5.6 Hz, NHCO<sub>2</sub>C(CH<sub>3</sub>)<sub>3</sub>), 3.62 (2H, q, <sup>3</sup>J<sub>HH</sub> = 6.7 Hz, CH<sub>2</sub>-αN), 3.53 – 3.43 (10H, m, CH<sub>2</sub>), 3.39 – 3.31 (6H, m, CH<sub>2</sub>), 3.02 (3H, d, <sup>3</sup>J<sub>HH</sub> = 4.6 Hz, CH<sub>3</sub>NHC=S), 2.95 (2H, q, <sup>3</sup>J<sub>HH</sub> = 6.6 Hz, CH<sub>2</sub>), 2.20, 2.19 (6H, 2 x s, 2 x CH<sub>3</sub>C=N), 1.82 (2H, p, <sup>3</sup>J<sub>HH</sub> = 6.5 Hz, CH<sub>2</sub>-βN), 1.58 (2H, p, <sup>3</sup>J<sub>HH</sub> = 6.6 Hz, CH<sub>2</sub>-βN), 1.37 (9H, s, C(CH<sub>3</sub>)<sub>3</sub>) ppm. **<sup>13</sup>C{<sup>1</sup>H} NMR** (101 MHz, DMSO-d<sub>6</sub>, 298 K): δ = 178.47 (C=S), 177.7 (C=S), 155.6 (C=O), 148.0 (CH<sub>3</sub>C=N), 147.8 (CH<sub>3</sub>C=N), 77.4 (C(CH<sub>3</sub>)<sub>3</sub>), 69.8 (CH<sub>2</sub>), 69.8 (CH<sub>2</sub>), 69.6 (CH<sub>2</sub>), 69.5 (CH<sub>2</sub>), 68.6 (CH<sub>2</sub>), 68.1 (CH<sub>2</sub>), 41.7 (CH<sub>2</sub>-αNHC=S), 37.2 (CH<sub>2</sub>-αNHC=O), 31.2 (SCH<sub>3</sub>), 29.7 (CH<sub>2</sub>-βN), 28.9 (CH<sub>2</sub>-βN), 28.3 (C(CH<sub>3</sub>)<sub>3</sub>), 11.7 (CH<sub>3</sub>C=N), 11.6 (CH<sub>3</sub>C=N) ppm. **HR-ESI-MS** (ESI+): *m/z* calcd. for C<sub>22</sub>H<sub>43</sub>N<sub>7</sub>O<sub>5</sub>S<sub>2</sub> [M+H]<sup>+</sup> 550.2840, found 550.2846.

## Compound 13

To a solution of compound **12** in CH<sub>2</sub>Cl<sub>2</sub> (20 mL) was added TFA (5 mL) and the reaction mixture was stirred at rt for 2 h. After this time, the solvent was removed under reduced pressure and the crude residue was co-evaporated several times with cyclohexane to afford the TFA salt of compound **13** (0.54 g; 80% yield) as a white solid. **<sup>1</sup>H NMR** (400 MHz, DMSO-d<sub>6</sub>, 298 K): δ (ppm) 8.38 (2H, s, CH<sub>2</sub>NHC=S, CH<sub>3</sub>NHC=S), 6.68 (3H, s, NH<sub>2</sub>, NHN=C), 3.66 – 3.57 (2H, m, CH<sub>2</sub>-αN), 3.53 – 3.38 (12H, m, CH<sub>2</sub>), 3.02 (3H, d, <sup>3</sup>J<sub>HH</sub> = 4.0 Hz, CH<sub>3</sub>NHC=S), 2.56 (2H, t, <sup>3</sup>J<sub>HH</sub> = 6.8 Hz, CH<sub>2</sub>), 2.20 (6H, d, <sup>3</sup>J<sub>HH</sub> = 4.6 Hz, 2 x CH<sub>3</sub>C=N), 1.82 (2H, p, <sup>3</sup>J<sub>HH</sub> = 6.6 Hz, CH<sub>2</sub>-βN), 1.55 (2H, p, <sup>3</sup>J<sub>HH</sub> = 6.5 Hz, CH<sub>2</sub>-βN). **<sup>13</sup>C{<sup>1</sup>H} NMR** (101 MHz, DMSO-d<sub>6</sub>, 298 K): δ (ppm) 178.5 (C=S), 177.7 (C=S), 148.0 (CH<sub>3</sub>C=N), 147.8 (CH<sub>3</sub>C=N), 69.8 (CH<sub>2</sub>), 69.7 (CH<sub>2</sub>), 69.6 (CH<sub>2</sub>), 69.5 (CH<sub>2</sub>), 68.6 (CH<sub>2</sub>), 68.4 (CH<sub>2</sub>), 41.7 (CH<sub>2</sub>-αNHC=S), 38.7 (CH<sub>2</sub>-αNHC=O), 33.2 (CH<sub>2</sub>-βN), 31.2 (SCH<sub>3</sub>), 30.7 (CH<sub>2</sub>-βN), 28.8 (impurity – C<sub>q</sub>), 11.7

( $\underline{\text{CH}_3\text{C}=\text{N}}$ ), 11.6 ( $\underline{\text{CH}_3\text{C}=\text{N}}$ ) ppm. **HR-ESI-MS** (ESI+):  $m/z$  calcd. for  $\text{C}_{17}\text{H}_{35}\text{N}_7\text{O}_3\text{S}_2$   $[\text{M}+\text{H}]^+$  450.2316, found 450.2321.

### Compound 8, $\text{H}_2\text{ATSM-PEG}_3\text{-ArN}_3$

A solution of 4-azidobenzoic acid (54 mg; 0.33 mmol; 1.5 equiv) and HATU (127 mg; 0.33 mmol; 1.5 equiv) in anhydrous DMF (4 mL) were stirred under an inert atmosphere at rt for 20 min. A solution of compound **13** (100 mg; 0.22 mmol; 1 equiv) in anhydrous DMF (1 mL) was then added and the mixture was stirred for a further 10 min. Then, DIPEA (155  $\mu\text{L}$ ; 0.88 mmol; 4 equiv) was added and the reaction mixture stirred at rt for 16 h. After this time, the reaction mixture was concentrated under reduced pressure and the crude residue was washed with  $\text{H}_2\text{O}$  ( $3 \times 25$  mL), taken up in and concentrated under reduced pressure. The crude residue was then purified by reversed-phase flash chromatography (C18, 0 to 100% MeOH/ $\text{H}_2\text{O}$  with 0.1% TFA) to afford compound **8** as a yellow solid (26 mg; 20% yield).  **$^1\text{H}$  NMR** (400 MHz, MeOD, 298 K):  $\delta$  = 7.84 (2H, d,  $^3J_{\text{HH}}$  = 8.7 Hz, Ar-CH), 7.13 (2H, d,  $^3J_{\text{HH}}$  = 8.6 Hz, Ar-CH), 3.76 (2H, t,  $^3J_{\text{HH}}$  = 6.6 Hz,  $\underline{\text{CH}_2-\alpha\text{NHC}=\text{S}}$ ), 3.65 – 3.55 (12H, m, 6 x  $\underline{\text{CH}_2}$ ), 3.46 (2H, t,  $^3J_{\text{HH}}$  = 6.8 Hz,  $\underline{\text{CH}_2-\alpha\text{NHC}=\text{O}}$ ), 3.35 (s, MeOH), 3.15 (3H, s,  $\text{SCH}_3$ ), 2.19 (6H, d,  $^3J_{\text{HH}}$  = 3.2 Hz, 2 x  $\underline{\text{CH}_3\text{C}=\text{N}}$ ), 1.90 (4H, m, 2 x  $\underline{\text{CH}_2-\beta\text{N}}$ ) ppm.  **$^{13}\text{C}\{^1\text{H}\}$  NMR** (101 MHz, MeOD, 298 K):  $\delta$  = 169.0 (C=O), 148.8 (C=S), 148.6 (C=S), 144.8 (Ar- $\text{C}_q$ ), 132.3 (Ar- $\text{C}_q$ ), 130.2 (Ar-CH), 120.0 (Ar-CH), 71.6 ( $\underline{\text{CH}_2}$ ), 71.5 ( $\underline{\text{CH}_2}$ ), 71.3 ( $\underline{\text{CH}_2}$ ), 71.3 ( $\underline{\text{CH}_2}$ ), 70.5 ( $\underline{\text{CH}_2}$ ), 70.3 ( $\underline{\text{CH}_2}$ ), 49.9 (MeOH), 43.5 ( $\underline{\text{CH}_2-\alpha\text{NHC}=\text{S}}$ ), 38.8 ( $\underline{\text{CH}_2-\alpha\text{NHC}=\text{O}}$ ), 31.2 ( $\text{SCH}_3$ ), 30.4 ( $\underline{\text{CH}_2-\beta\text{N}}$ ), 30.0 ( $\underline{\text{CH}_2-\beta\text{N}}$ ), 11.1 ( $\underline{\text{CH}_3\text{C}=\text{N}}$ ), 11.0 ( $\underline{\text{CH}_3\text{C}=\text{N}}$ ) ppm. **HR-ESI-MS** (ESI+):  $m/z$  calcd. for  $\text{C}_{24}\text{H}_{39}\text{N}_{10}\text{O}_4\text{S}_2$   $[\text{M}+\text{H}]^+$  595.25917, found 595.25933.

### Metalation of compounds 6, 7 and 8

#### Zn-6

To a stirred suspension of ATSM/en, compound **6** (34.6 mg; 0.12 mmol; 1 equiv) in MeOH (3.5 mL) was added  $\text{Zn}(\text{AcO})_2 \cdot 2\text{H}_2\text{O}$  (31.6 mg; 0.144 mmol, 1.2 equiv) and the reaction mixture was stirred for 1 h, resulting in a yellow solution. The reaction mixture was diluted with  $\text{H}_2\text{O}$ , and  $\text{Et}_3\text{N}$  (~150  $\mu\text{L}$ ; 3 drops) was added producing a dark yellow precipitate. The suspension was filtered, washed with  $\text{H}_2\text{O}$  ( $3 \times 5$  mL),  $\text{Et}_2\text{O}$  ( $2 \times 3$  mL) and dried under high-vacuum to afford Zn-6 (30.7 mg; 73% yield) as a yellow solid. **Reverse-phase HPLC**:  $R_t$  7.28 min. Method: 0.9 mL/min (MeCN/ $\text{H}_2\text{O}$  with 0.1% TFA): start 30% MeCN, hold until 1 min,

gradient to 95% MeCN at 15 min, hold until 17 min. **HR-ESI-MS** (ESI+):  $m/z$  calcd. for  $C_9H_{17}N_7S_2Zn$   $[M+H]^+$  352.03511, found 352.03511.

### **Cu-6**

To a stirred suspension of ATSM/en, compound **6** (16.6 mg; 0.057 mmol; 1 equiv) in MeOH (1.5 mL) was added  $Cu(OAc)_2$  (11.3 mg; 0.062 mmol) and the reaction mixture was stirred for 1 h, resulting in a dark brown solution. The reaction mixture was diluted with  $H_2O$ , and  $Et_3N$  (~100  $\mu$ L; 2 drops) was added producing a dark brown precipitate. The suspension was filtered, washed with  $H_2O$  ( $3 \times 5$  mL),  $Et_2O$  ( $2 \times 3$  mL) and dried under high-vacuum to furnish **Cu-6** (17.0 mg; 85% yield) as a dark brown solid. **Reverse-phase HPLC**:  $R_t$  5.44 min. Method: 0.9 mL/min (MeCN/ $H_2O$  with 0.1%TFA): start 30% MeCN, hold until 1 min, gradient to 95% MeCN at 15 min, hold until 17 min. **HR-ESI-MS** (ESI+):  $m/z$  calc. for  $C_9H_{17}N_7S_2Cu$   $[M+H]^+$  351.03556, found 351.03526.

### **Zn-7**

To a stirred suspension of  $H_2ATSM/en-ArN_3$ , compound **7** (26.7 mg; 0.0614 mmol; 1 equiv) in MeOH (6 mL) was added  $Zn(OAc)_2 \cdot 2H_2O$  (33.7 mg; 0.154 mmol; 2.5 equiv) and the reaction mixture was stirred for 16 h under reflux, resulting in a yellow solution. The reaction mixture was diluted with  $H_2O$  (4.5 mL) and the organic solvent was removed under reduced pressure. The remaining aqueous solution was extracted with EtOAc ( $3 \times 15$  mL) and the combined organic fractions were dried over  $MgSO_4$ , concentrated under reduced pressure and dried under high-vacuum to furnish **Zn-7** (23.2 mg; 76% yield) as a yellow solid. **UV/vis**:  $\lambda_{max} = 430$  nm. **Reverse-phase HPLC**:  $R_t$  9.62 min. Method: 0.9 mL/min (MeCN/ $H_2O$  0.1%TFA): start 30% MeCN, hold until 1 min, gradient to 95% MeCN at 15 min, hold until 17 min. **HR-ESI-MS** (ESI+):  $m/z$  calcd. for  $C_{16}H_{20}N_{10}OS_2Zn$   $[M+H]^+$  497.06272, found 497.06261.

### **Cu-7**

To a solution of  $H_2ATSM/en-ArN_3$ , compound **7** (3.2 mg; 7.40  $\mu$ mol; 1 equiv) in DMF (0.2 mL) was added  $Cu(AcO)_2$  (1.6 mg; 8.50  $\mu$ mol; 1.2 equiv) and the mixture was stirred at rt for 1 h, resulting in a dark red/brown solution. The reaction mixture was diluted with  $H_2O$  (5 mL),

affording a dark red precipitate. The solid was collected by vacuum filtration, washed with H<sub>2</sub>O (3 × 5 mL), Et<sub>2</sub>O (2 × 3 mL) and concentrated under reduced pressure to furnish Cu-7 (2.75 mg; 75% yield) as a red/brown solid. **UV/vis**:  $\lambda_{\max}$  = 476 nm. **Reverse-phase HPLC**:  $R_t$  8.32 min. Method: 0.9 mL/min (MeCN/H<sub>2</sub>O 0.1%TFA): start 30% MeCN, hold until 1 min, gradient to 95% MeCN at 15 min, hold until 17 min. **HR-ESI-MS** (ESI+):  $m/z$  calcd. for C<sub>16</sub>H<sub>20</sub>N<sub>10</sub>OS<sub>2</sub>Cu [M+Na]<sup>+</sup> 518.04512, found 518.04445.

### Zn-8

To a stirred suspension of H<sub>2</sub>ATSM-PEG<sub>3</sub>-ArN<sub>3</sub>, compound **8** (3.0 mg; 0.005 mmol; 1 equiv) in MeOH (1 mL) was added Zn(OAc)<sub>2</sub>·2H<sub>2</sub>O (2.8 mg; 0.013 mmol; 2.5 equiv) and the reaction mixture was stirred for 16 h under reflux, resulting in a yellow solution. The reaction mixture was diluted with H<sub>2</sub>O (1 mL) and the organic solvent was removed under reduced pressure. The remaining aqueous solution was extracted with EtOAc (3 × 5 mL) and the combined organic fractions were dried over MgSO<sub>4</sub>, concentrated under reduced pressure and dried under high-vacuum to furnish Zn-7 (3.2 mg; 97% yield) as a yellow solid. **UV/vis**:  $\lambda_{\max}$  = 430 nm. **Reverse-phase HPLC**:  $R_t$  11.89 min. Method: 0.9 mL/min (MeCN/H<sub>2</sub>O with 0.1%TFA): start 30% MeCN, hold until 1 min, gradient to 95% MeCN at 15 min, hold until 17 min. **HR-ESI-MS** (ESI+):  $m/z$  calcd. for C<sub>24</sub>H<sub>36</sub>N<sub>10</sub>O<sub>4</sub>S<sub>2</sub>Zn [M+H]<sup>+</sup> 657.17288, found 657.17266.

### Cu-8

To a solution of ATSM-PEG<sub>3</sub>-ArN<sub>3</sub>, compound **8** (3.0 mg; 0.005 mmol; 1 equiv) in DMF (1 mL) was added Cu(AcO)<sub>2</sub> (1.1 mg; 0.006 mmol; 1.2 equiv) and the mixture was stirred at rt for 1 h, resulting in a dark red/brown solution. The reaction mixture was diluted with H<sub>2</sub>O (5 mL), affording a dark red precipitate. The solid was collected by vacuum filtration, washed with H<sub>2</sub>O (3 × 5 mL), Et<sub>2</sub>O (2 × 3 mL) and concentrated under reduced pressure to furnish Cu-7 (2.75 mg; 75% yield) as a red/brown solid. **UV/vis**:  $\lambda_{\max}$  = 476 nm. **Reverse-phase HPLC**:  $R_t$  10.84 min. Method: 0.9 mL/min (MeCN/H<sub>2</sub>O with 0.1%TFA): start 30% MeCN, hold until 1 min, gradient to 95% MeCN at 15 min, hold until 17 min. **HR-ESI-MS** (ESI+):  $m/z$  calcd. for C<sub>24</sub>H<sub>36</sub>N<sub>10</sub>O<sub>4</sub>S<sub>2</sub>Cu [M+H]<sup>+</sup> 656.17340, found 656.17312.

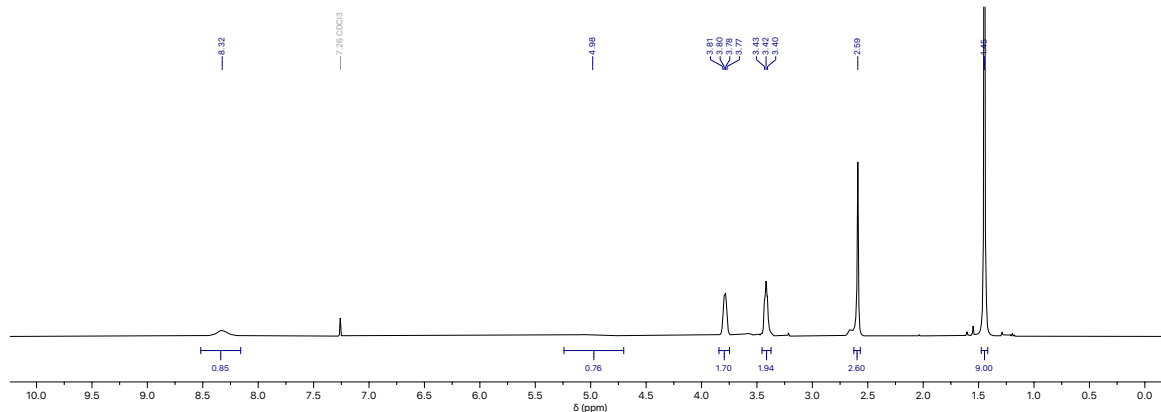

**Figure S1.**  $^1\text{H}$  NMR (400 MHz,  $\text{CDCl}_3$ , 298 K) spectrum of compound **2**

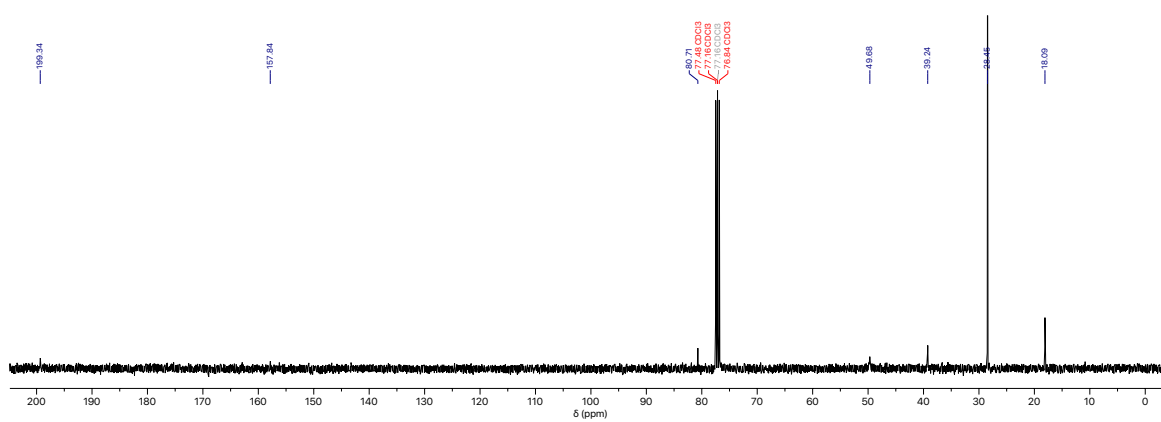

**Figure S2.**  $^{13}\text{C}\{^1\text{H}\}$  NMR (101 MHz,  $\text{CDCl}_3$ , 298 K) spectrum of compound **2**

hoQEx9116 #38-50 RT: 0.38-0.47 AV: 6 SB: 23 0.04-0.25, 0.73-0.97 NL: 5.63E8  
T: FTMS + p ESI Full ms [100.0000-1500.0000]

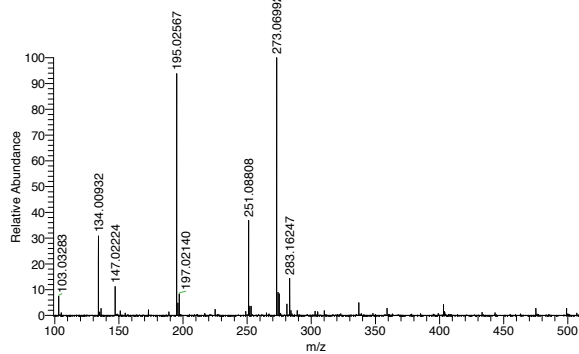

hoQEx9116 #38-50 RT: 0.38-0.47 AV: 6 SB: 23 0.04-0.25, 0.73-0.97 NL: 5.63E8  
T: FTMS + p ESI Full ms [100.0000-1500.0000]

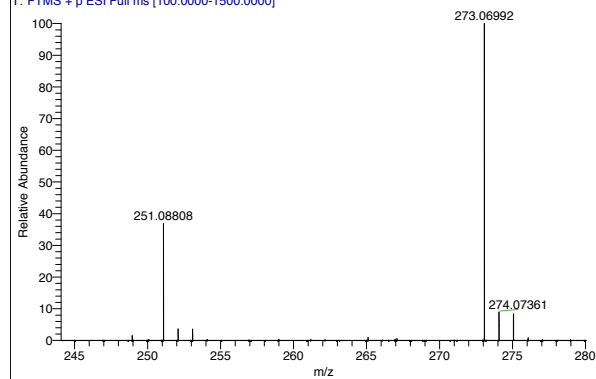

**Figure S3.** HR-ESI-MS spectrum of compound **2**

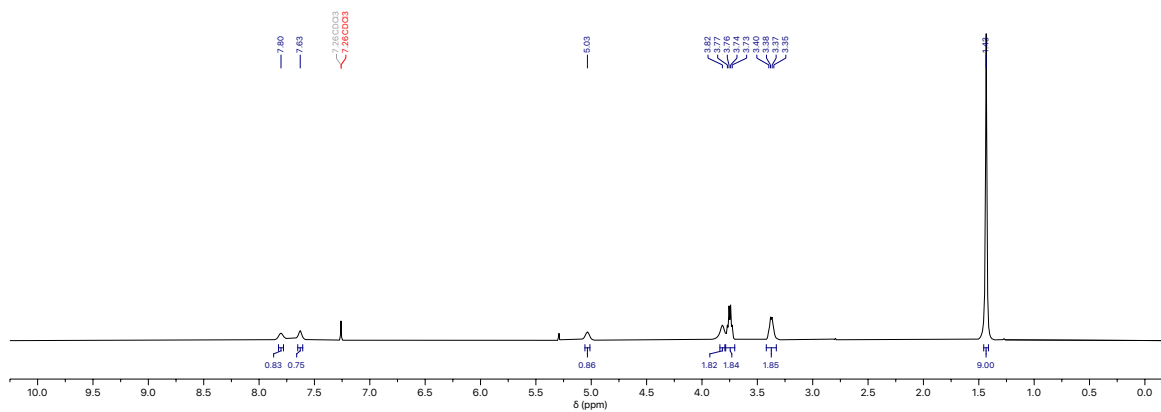

**Figure S4.**  $^1\text{H}$  NMR (400 MHz,  $\text{CDCl}_3$ , 298 K) spectrum of compound **3**

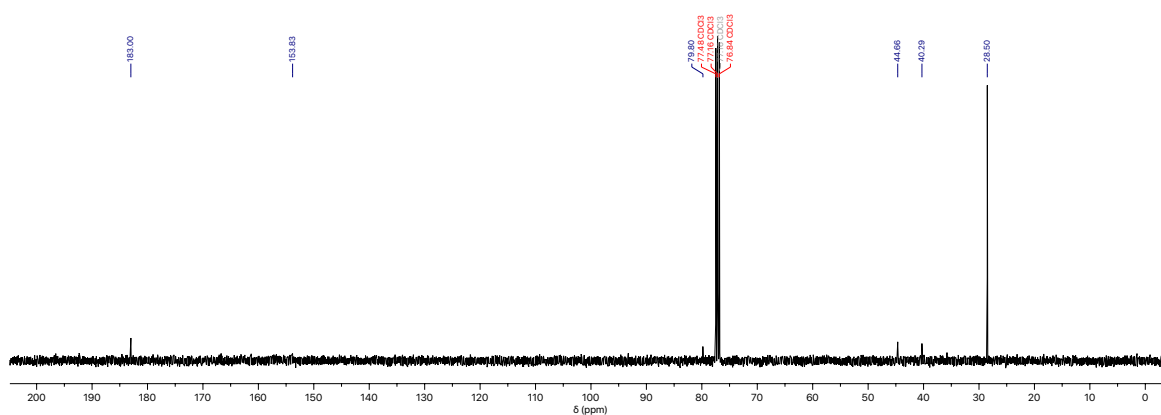

**Figure S5.**  $^{13}\text{C}\{^1\text{H}\}$  NMR (101 MHz,  $\text{CDCl}_3$ , 298 K) spectrum of compound **3**

hoQEx9209 #38-59 RT: 0.37-0.57 AV: 11 SB: 24 0.06-0.25 , 0.72-0.98 NL: 1.10E9  
T: FTMS + p ESI Full ms [50.0000-750.0000]

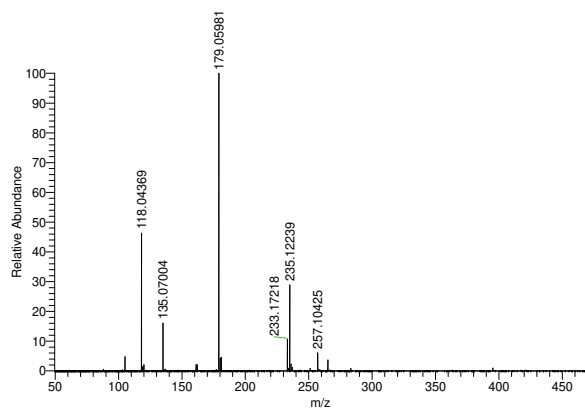

hoQEx9209 #42-51 RT: 0.41-0.49 AV: 5 SB: 24 0.06-0.25 , 0.72-0.98 NL: 4.37E8  
T: FTMS + p ESI Full ms [50.0000-750.0000]

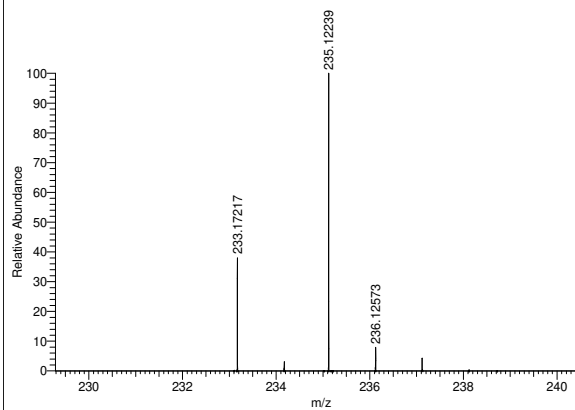

**Figure S6.** HR-ESI-MS spectrum of compound **3**

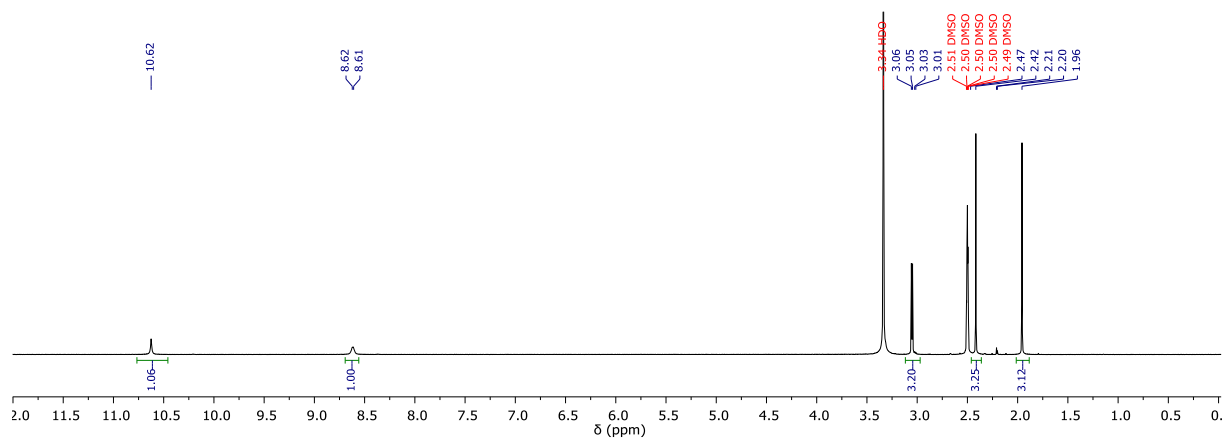

**Figure S7.** <sup>1</sup>H NMR (400 MHz, DMSO-d<sub>6</sub>, 298 K) spectrum of compound **4**

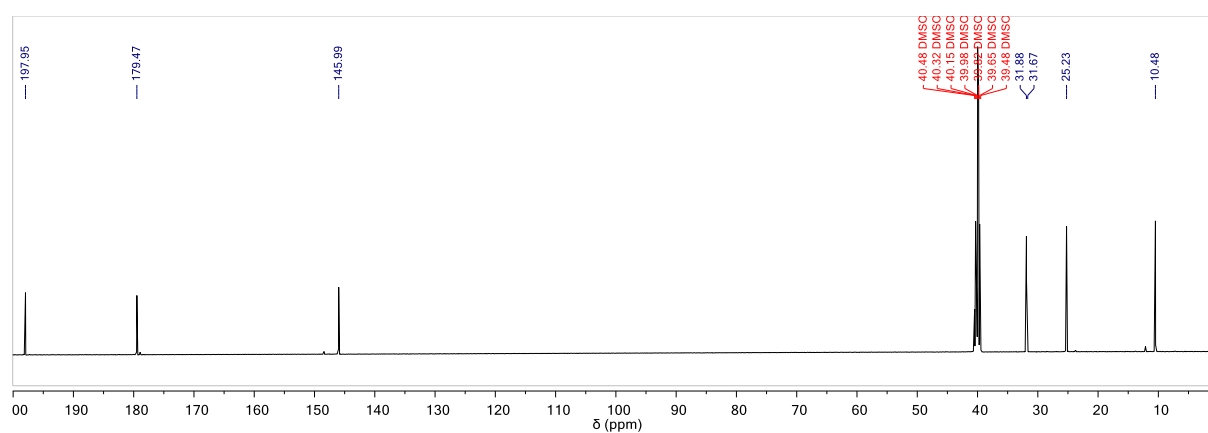

**Figure S8.** <sup>13</sup>C {<sup>1</sup>H} NMR (101 MHz, DMSO-d<sub>6</sub>, 298 K) spectrum of compound **4**

20\_hoQEx\_0365 #35-69 RT: 0.35-0.66 AV: 17 SB: 24 0.06-0.25 , 0.72-0.99 NL: 4.59E7  
T: FTMS - p ESI Full lock ms [50.0000-750.0000]

20\_hoQEx\_0365 #41-51 RT: 0.40-0.48 AV: 5 SB: 23 0.06-0.25 , 0.72-0.98 NL: 9.67E7  
T: FTMS - p ESI Full lock ms [50.0000-750.0000]

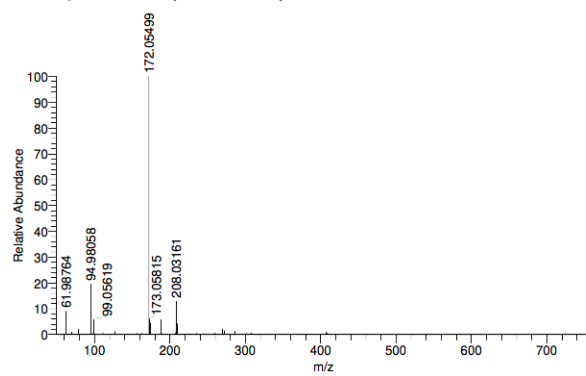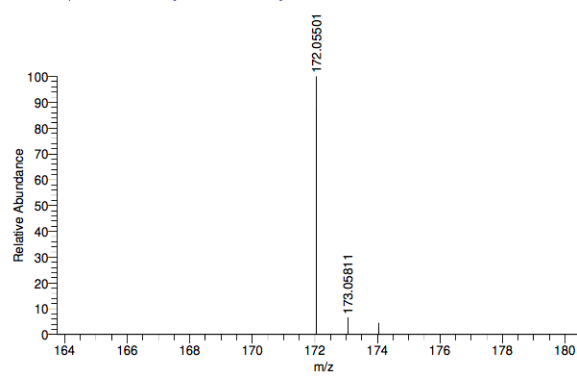

**Figure S9.** HR-ESI-MS spectrum of compound **4**



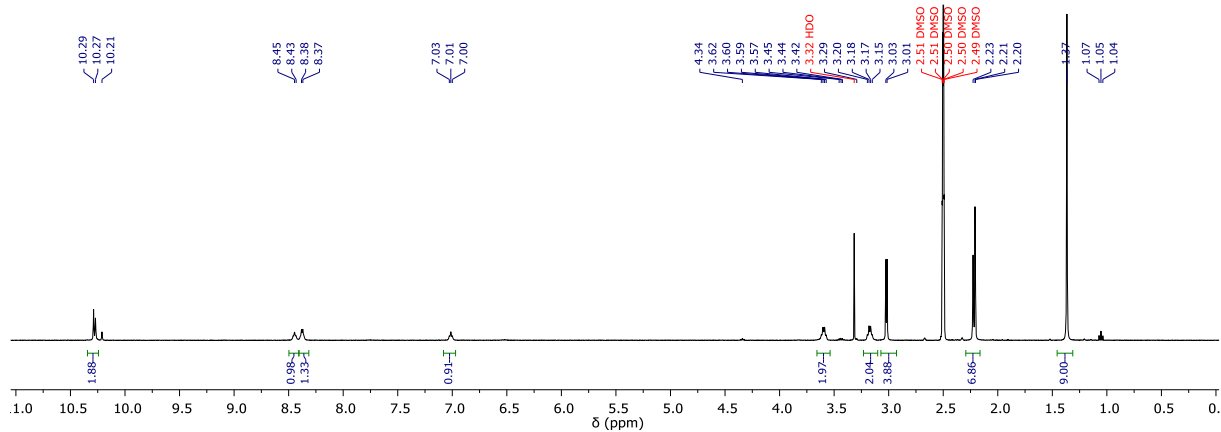

Figure S10.  $^1\text{H}$  NMR (400 MHz,  $\text{DMSO-d}_6$ , 298 K) spectrum of compound **5**

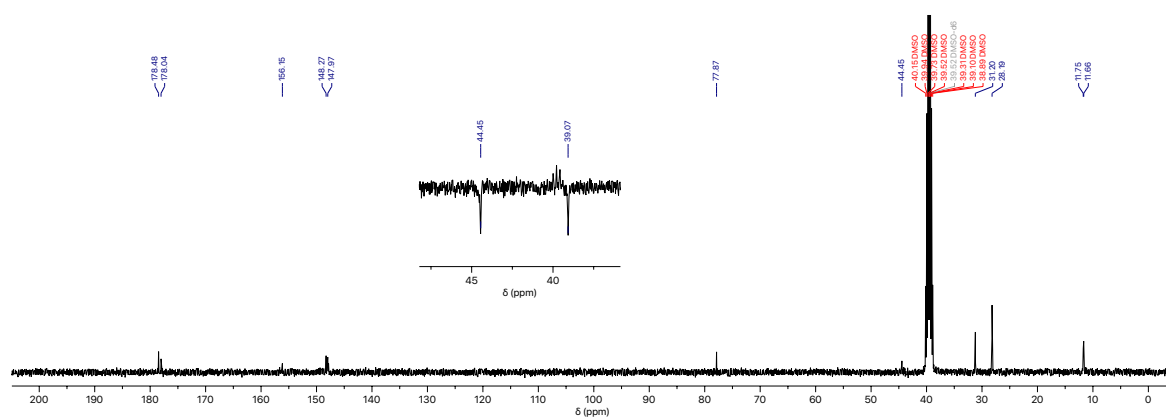

Figure S11.  $^{13}\text{C}\{^1\text{H}\}$  NMR (101 MHz,  $\text{DMSO-d}_6$ , 298 K) spectrum of compound **5**

hoQEx9309 #63-74 RT: 0.61-0.70 AV: 6 SB: 11 0.04-0.25 NL: 7.42E6  
T: FTMS + p ESI Full lock ms [100.0000-1500.0000]

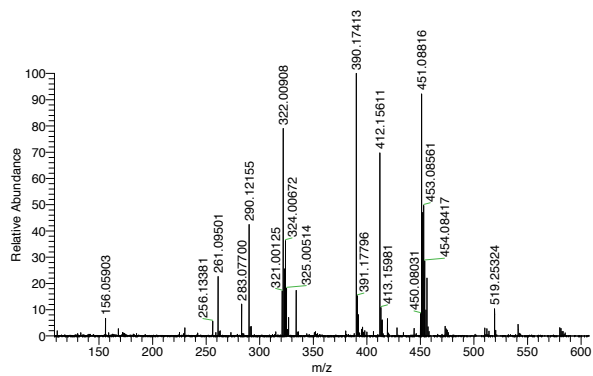

hoQEx9309 #63-73 RT: 0.61-0.70 AV: 6 SB: 11 0.04-0.25 NL: 7.42E6  
T: FTMS + p ESI Full lock ms [100.0000-1500.0000]

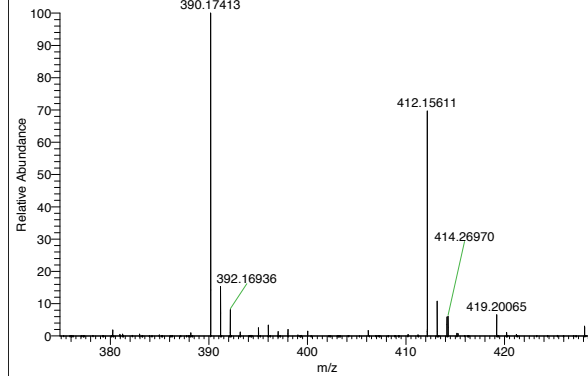

Figure S12. HR-ESI-MS spectrum of compound **5**

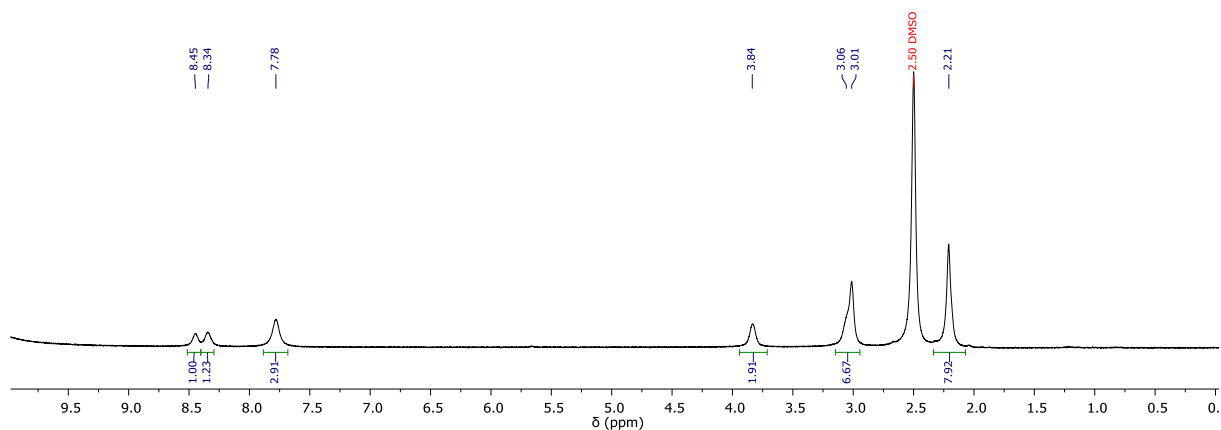

**Figure S13.** <sup>1</sup>H NMR (400 MHz, DMSO-d<sub>6</sub>, 298 K) spectrum of compound 6

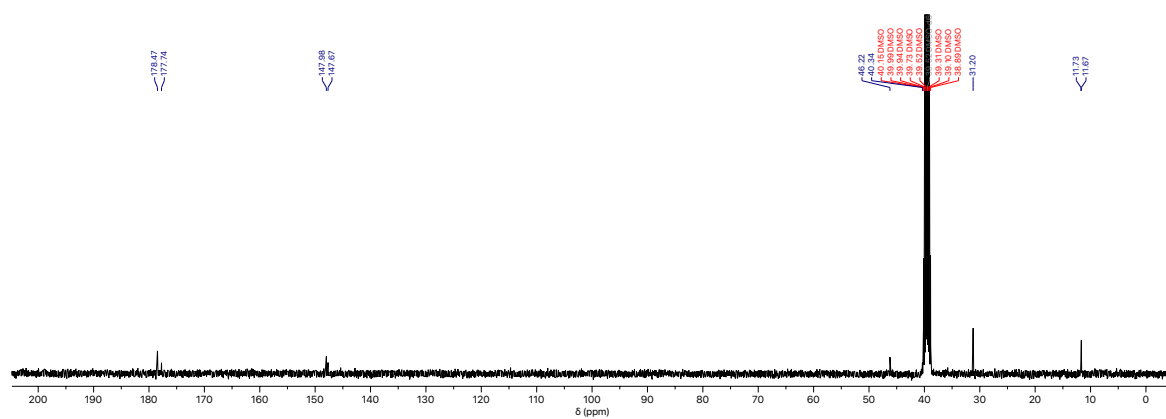

**Figure S14.** <sup>13</sup>C {<sup>1</sup>H} NMR (101 MHz, DMSO-d<sub>6</sub>, 298 K) spectrum of compound 6

20\_hoQEx\_0369 #34-58 RT: 0.35-0.56 AV: 12 SB: 24 0.03-0.24, 0.70-0.95 NL: 1.61E9  
T: FTMS + p ESI Full ms [100.0000-1500.0000]

20\_hoQEx\_0369 #33-67 RT: 0.33-0.65 AV: 18 SB: 24 0.03-0.24, 0.70-0.95 NL: 1.12E9  
T: FTMS + p ESI Full lock ms [100.0000-1500.0000]

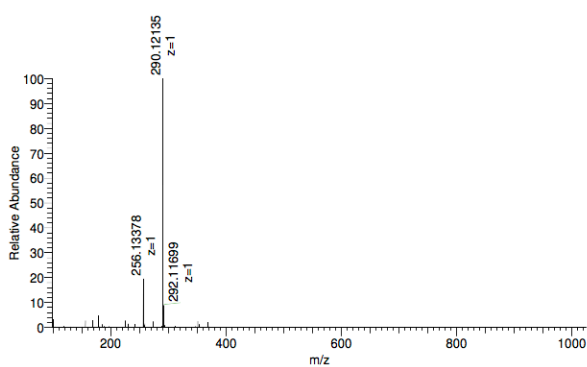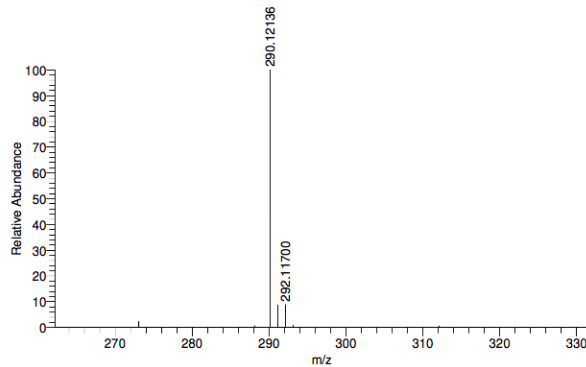

**Figure S15.** HR-ESI-MS spectrum of compound 6

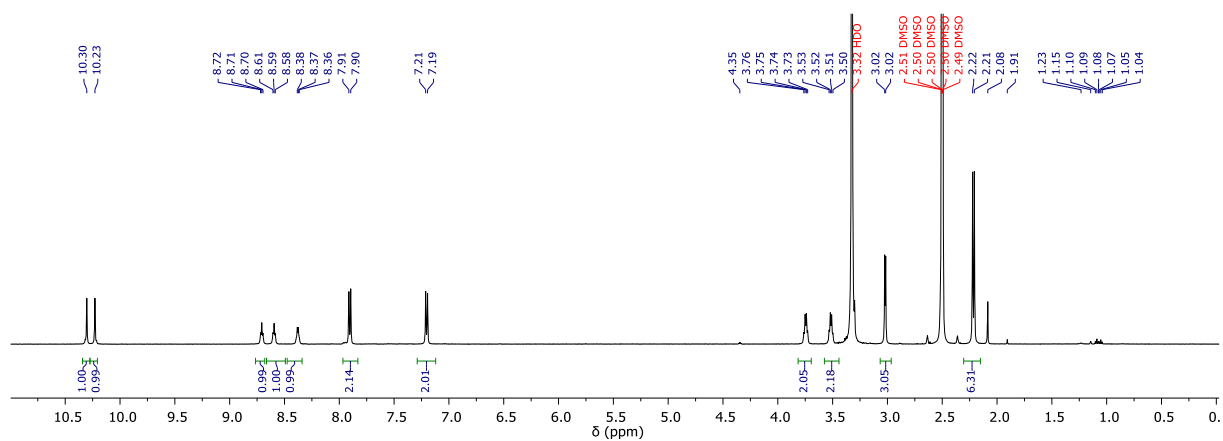

Figure S16.  $^1\text{H}$  NMR (500 MHz, DMSO- $d_6$ , 298 K) spectrum of compound 7

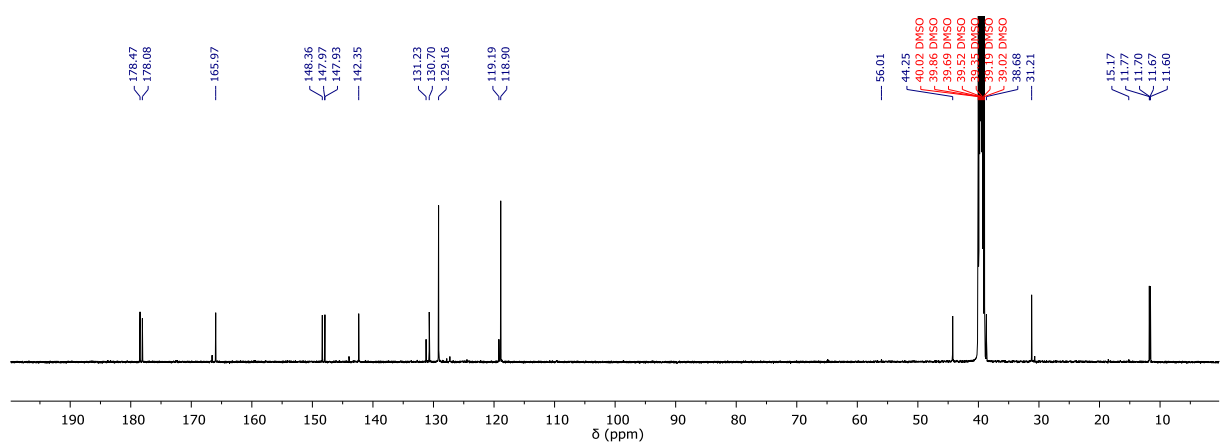

Figure S17.  $^{13}\text{C}\{^1\text{H}\}$  NMR (126 MHz, DMSO- $d_6$ , 298 K) spectrum of compound 7

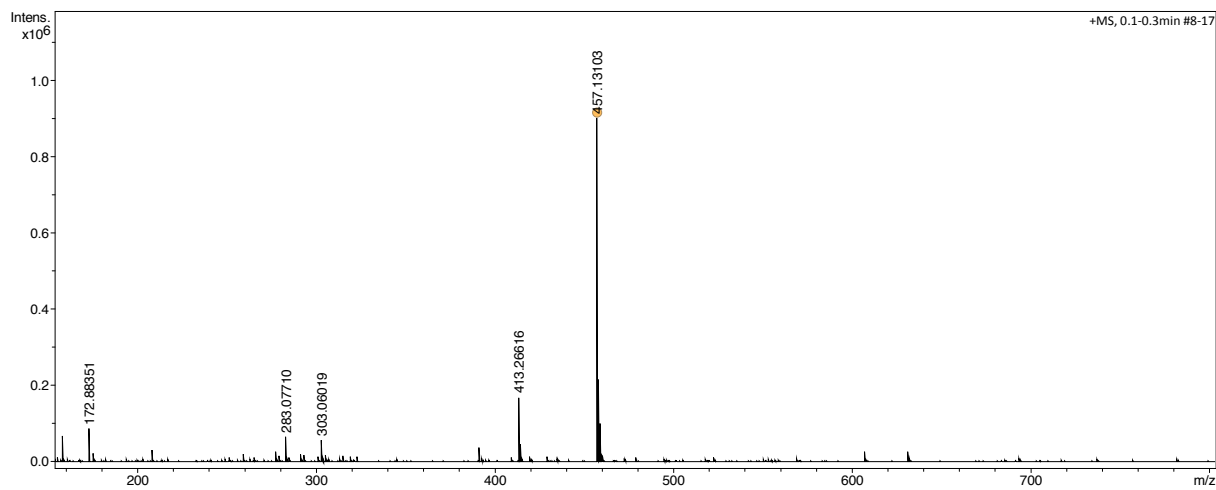

Figure S18. HR-ESI-MS spectrum of compound 7

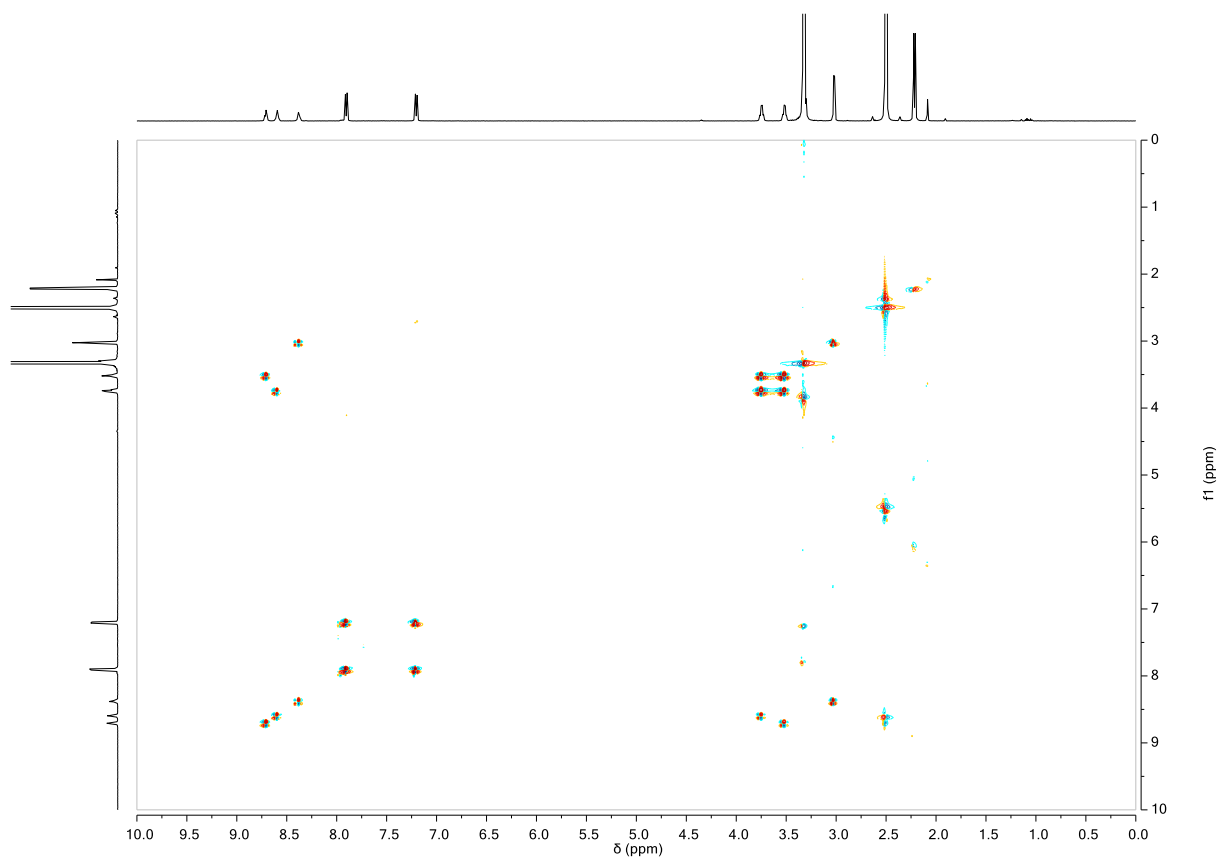

**Figure S19.**  $^1\text{H}$  COSY NMR (400 MHz,  $\text{DMSO-d}_6$ , 298 K) spectrum of compound **7**

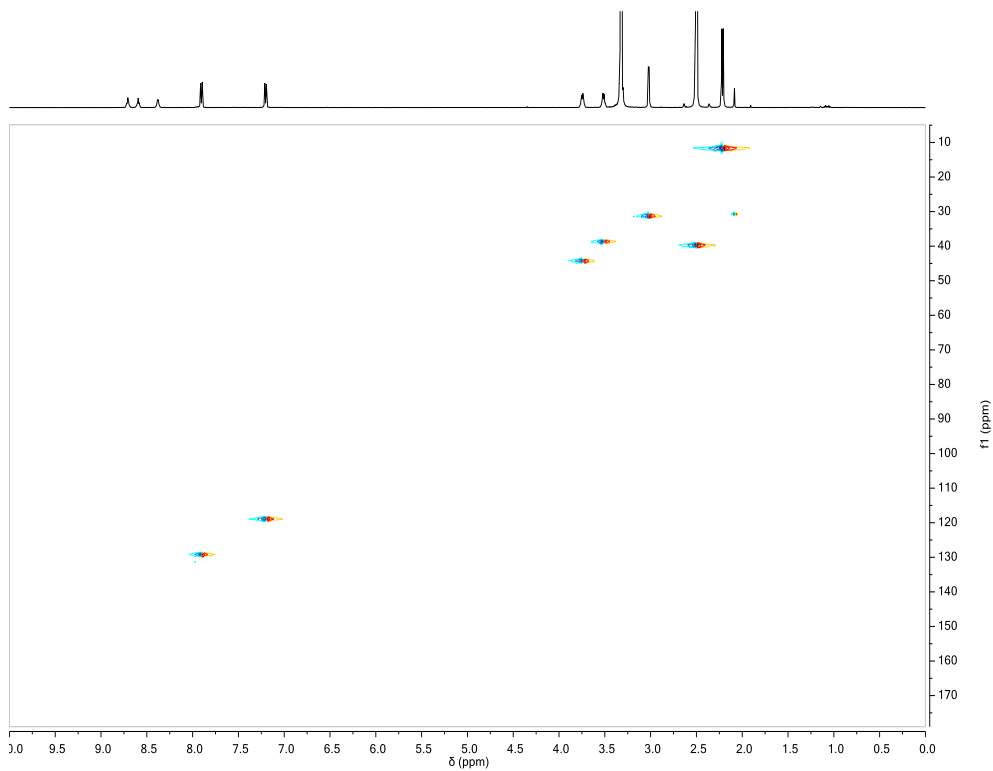

**Figure S20.**  $^1\text{H}$ - $^{13}\text{C}\{^1\text{H}\}$  HSQC NMR (400 MHz,  $\text{DMSO-d}_6$ , 298 K) spectrum of compound **7**

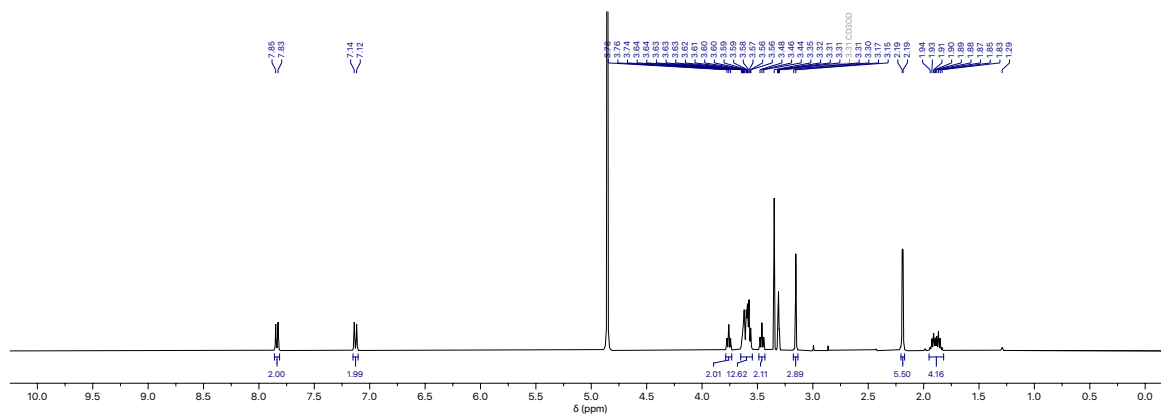

Figure S21  $^1\text{H}$  NMR (400 MHz, MeOD, 298 K) spectrum of compound **8**

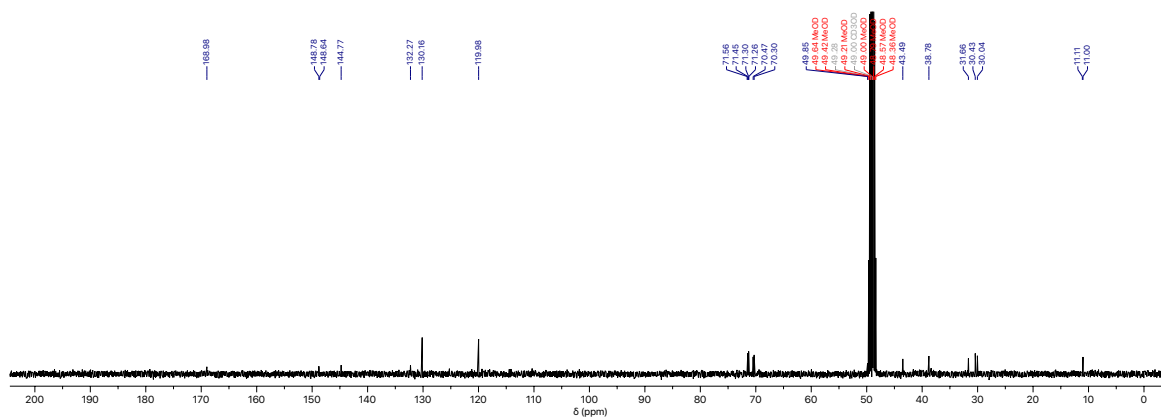

Figure S22.  $^{13}\text{C}\{^1\text{H}\}$  NMR (101 MHz, MeOD, 298 K) spectrum of compound **8**

20\_hoQEx\_0136 #39-51 RT: 0.38-0.49 AV: 7 SB: 25 0.03-0.24 , 0.70-0.95 NL: 1.52E8  
T: FTMS + p ESI Full lock ms [100.0000-1500.0000]

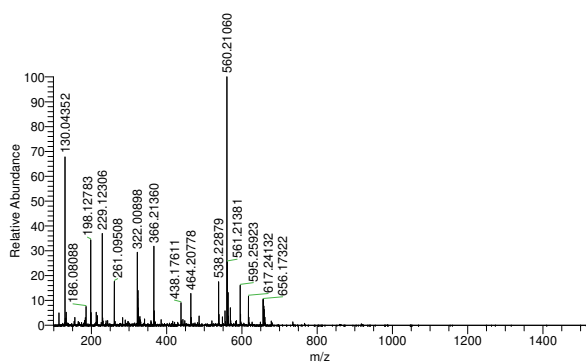

20\_hoQEx\_0136 #41-47 RT: 0.39-0.45 AV: 4 SB: 25 0.03-0.24 , 0.70-0.95 NL: 1.89E8  
T: FTMS + p ESI Full lock ms [100.0000-1500.0000]

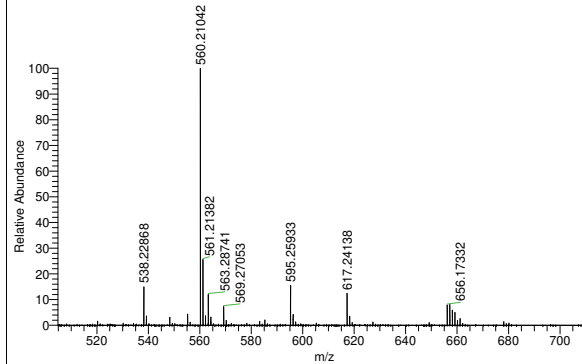

Figure S23. HR-ESI-MS spectrum of compound **8**

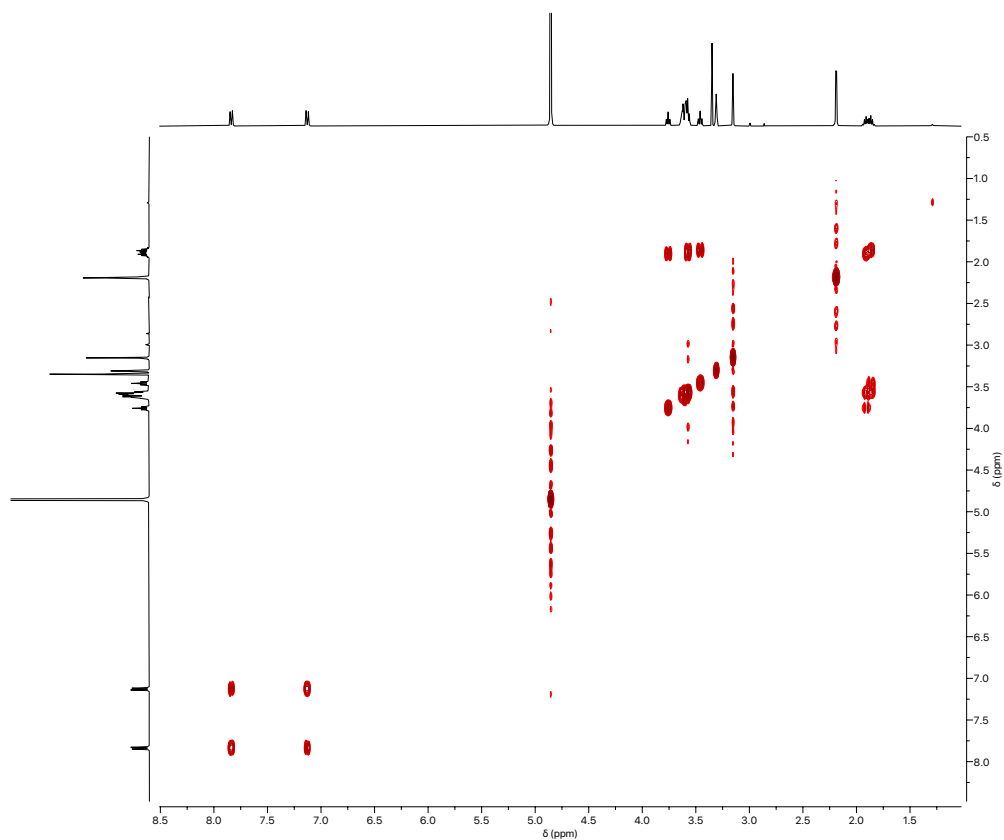

**Figure S24.**  $^1\text{H}$  COSY NMR (400 MHz, MeOD, 298 K) spectrum of compound **8**

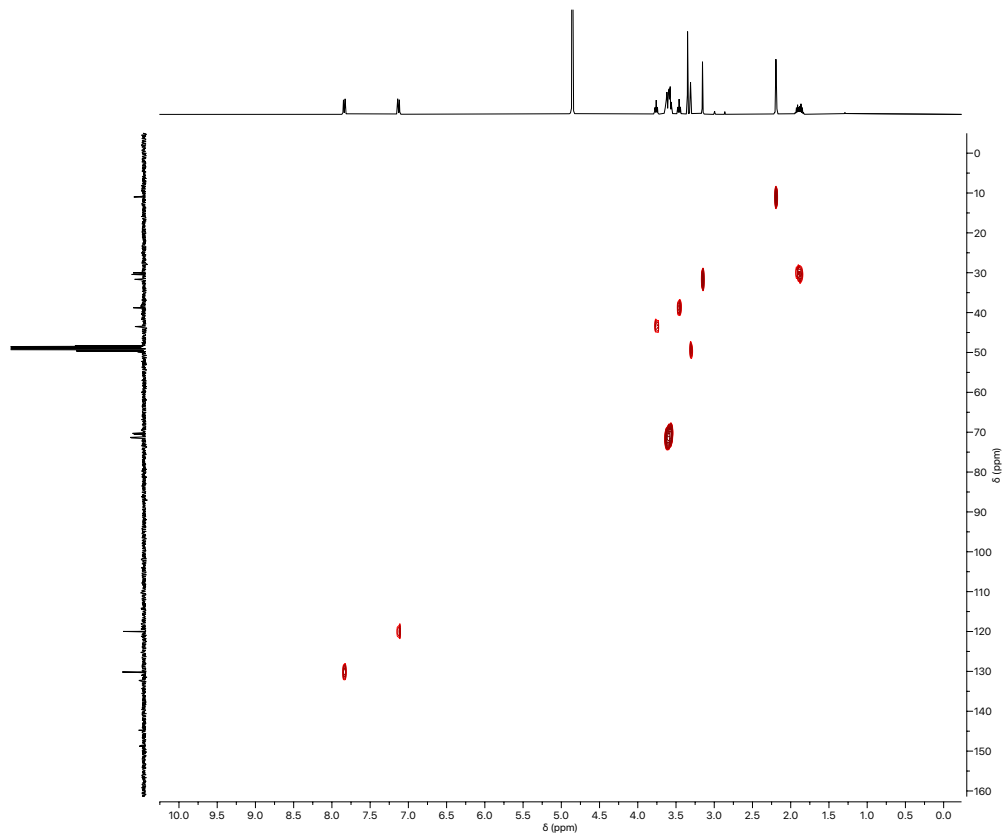

**Figure S25.**  $^1\text{H}$ - $^{13}\text{C}\{^1\text{H}\}$  HSQC NMR (400 MHz, MeOD, 298 K) spectrum of compound **8**

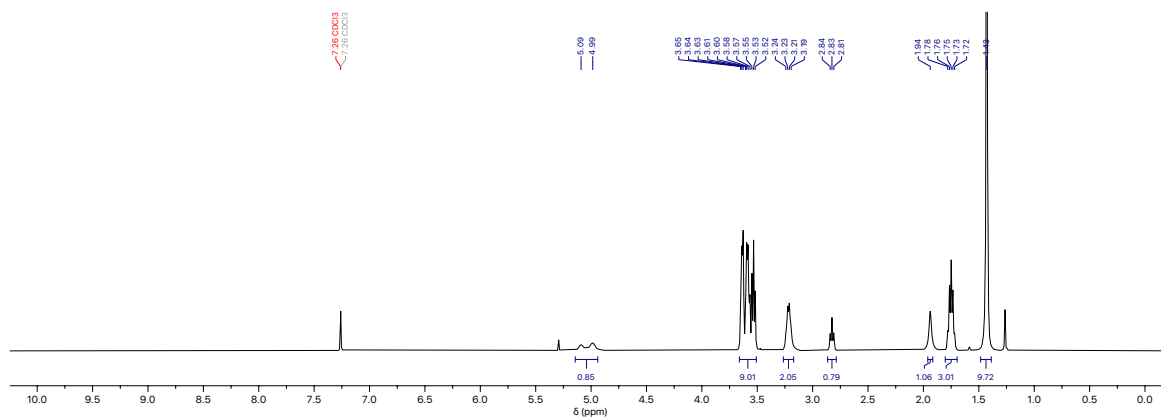

Figure S26.  $^1\text{H}$  NMR (400 MHz,  $\text{CDCl}_3$ , 298 K) spectrum of compound **9**

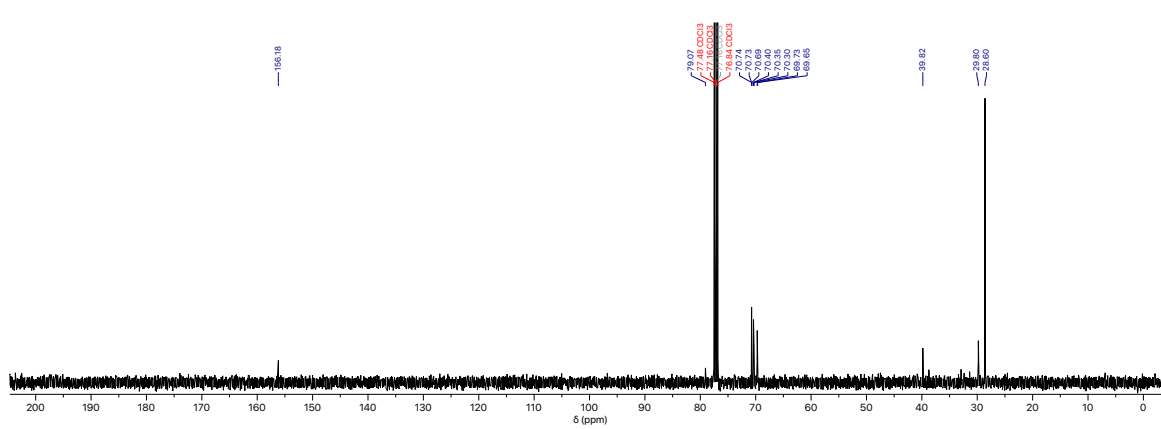

Figure S27.  $^{13}\text{C}\{^1\text{H}\}$  NMR (101 MHz,  $\text{CDCl}_3$ , 298 K) spectrum of compound **9**

hoQEx9502 #41-48 RT: 0.39-0.45 AV: 4 SB: 25 0.03-0.24 , 0.70-0.95 NL: 3.12E9  
T: FTMS + p ESI Full ms [100.0000-1500.0000]

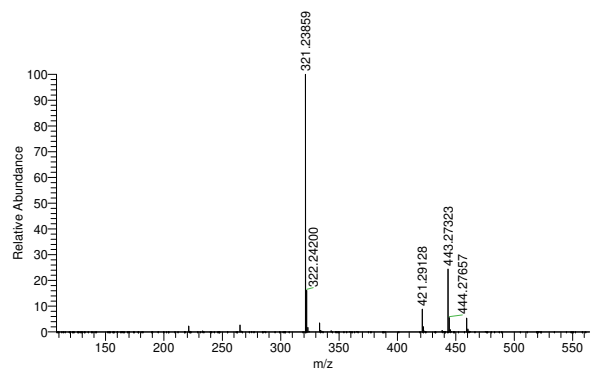

hoQEx9502 #41-47 RT: 0.39-0.45 AV: 4 SB: 26 0.03-0.24 , 0.70-0.95 NL: 3.12E9  
T: FTMS + p ESI Full ms [100.0000-1500.0000]

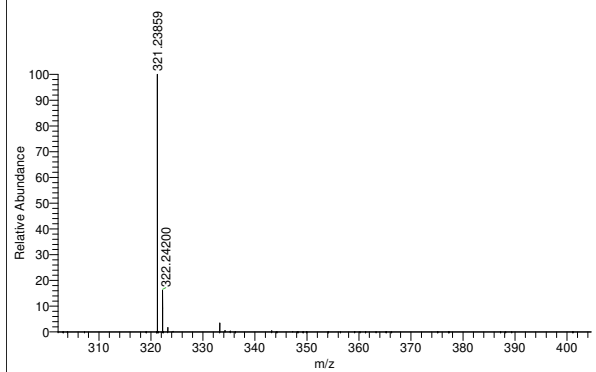

Figure S28. HR-ESI-MS spectrum of compound **9**

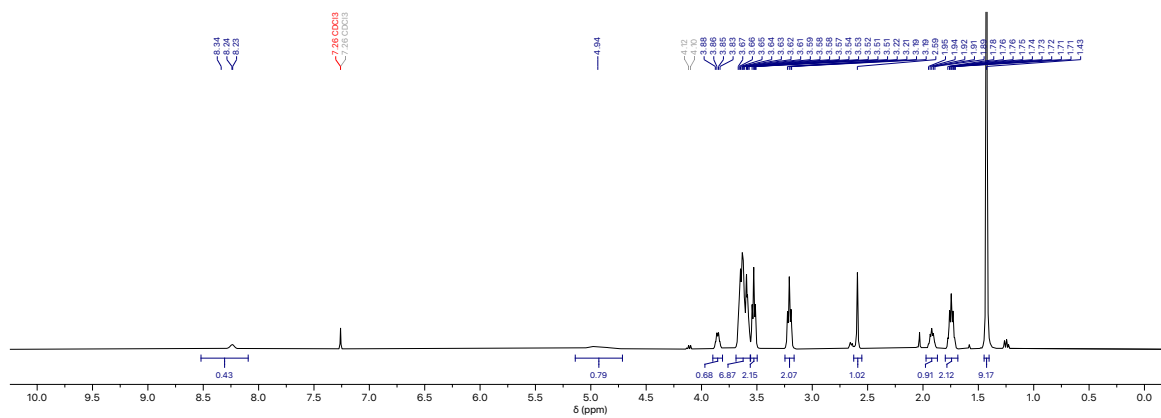

Figure S29.  $^1\text{H}$  NMR (500 MHz,  $\text{CDCl}_3$ , 298 K) spectrum of compound **10**

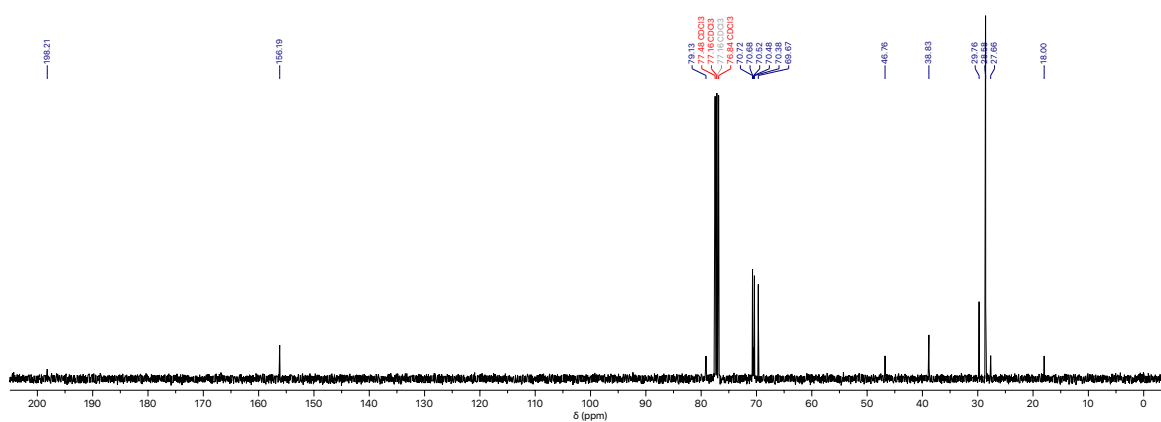

Figure S30.  $^{13}\text{C}\{^1\text{H}\}$  NMR (126 MHz,  $\text{CDCl}_3$ , 298 K) spectrum of compound **10**

hoQEx9125 #39-50 RT: 0.37-0.47 AV: 6 SB: 24 0.04-0.25 , 0.73-0.97 NL: 1.55E9  
T: FTMS + p ESI Full ms [100.0000-1500.0000]

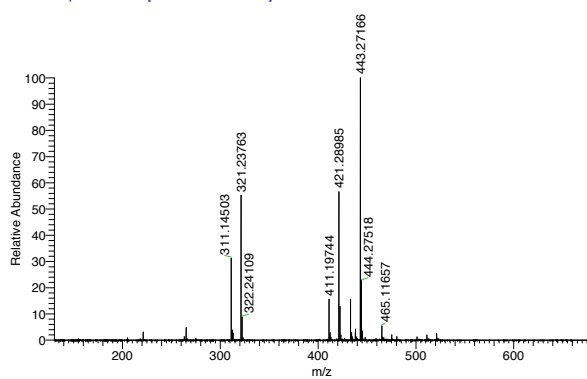

hoQEx9125 #39-50 RT: 0.37-0.47 AV: 6 SB: 24 0.04-0.25 , 0.73-0.97 NL: 1.55E9  
T: FTMS + p ESI Full ms [100.0000-1500.0000]

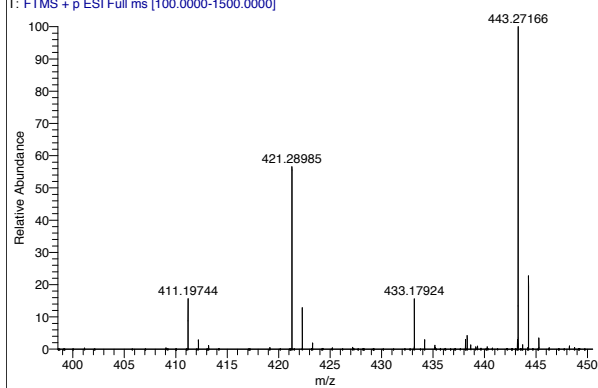

Figure S31. HR-ESI-MS spectrum of compound **10**



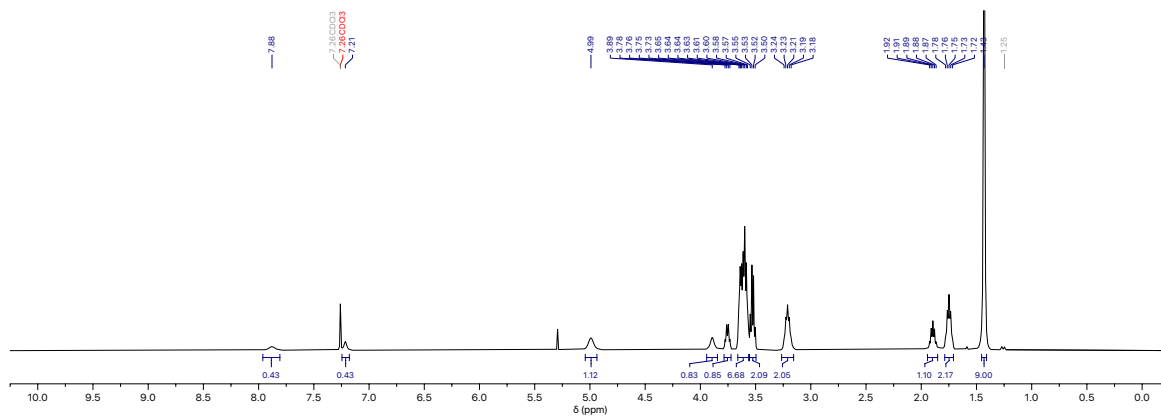

Figure S32.  $^1\text{H}$  NMR (400 MHz,  $\text{CDCl}_3$ , 298 K) spectrum of compound **11**

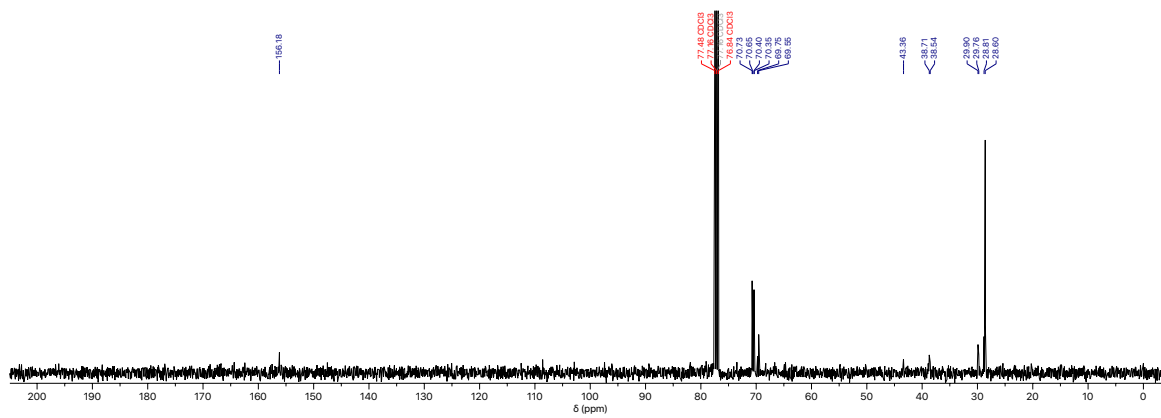

Figure S33.  $^{13}\text{C}\{^1\text{H}\}$  NMR (101 MHz,  $\text{CDCl}_3$ , 298 K) spectrum of compound **11**

hoQEx9214 #41-48 RT: 0.39-0.45 AV: 4 SB: 25 0.03-0.24 , 0.70-0.95 NL: 3.18E9  
T: FTMS + p ESI Full ms [100.0000-1500.0000]

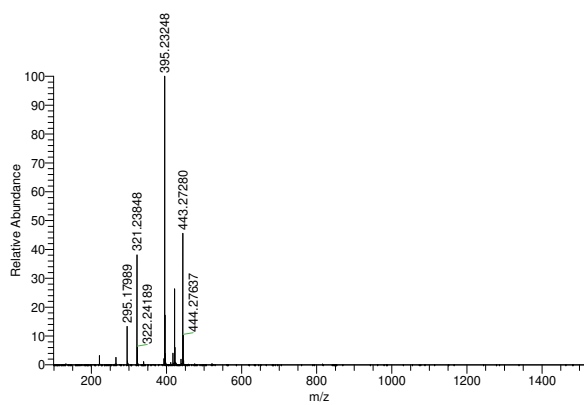

hoQEx9214 #41-47 RT: 0.39-0.45 AV: 4 SB: 25 0.03-0.24 , 0.70-0.95 NL: 3.18E9  
T: FTMS + p ESI Full ms [100.0000-1500.0000]

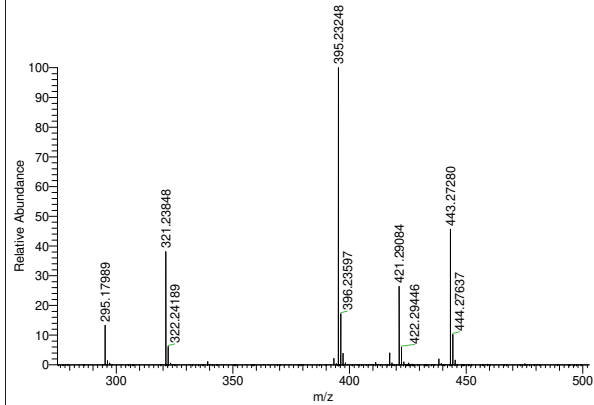

Figure S34. HR-ESI-MS spectrum of compound **11**

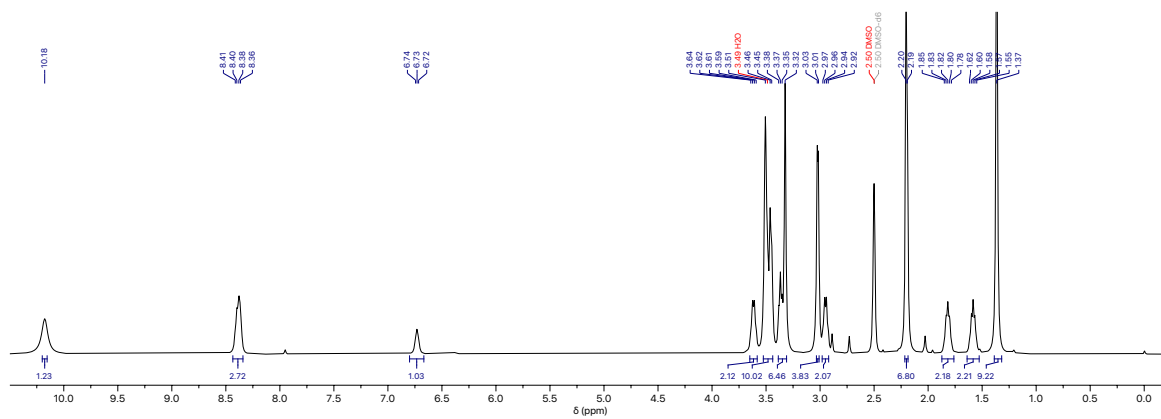

Figure S35.  $^1\text{H}$  NMR (400 MHz,  $\text{DMSO-d}_6$ , 298 K) spectrum of compound **12**

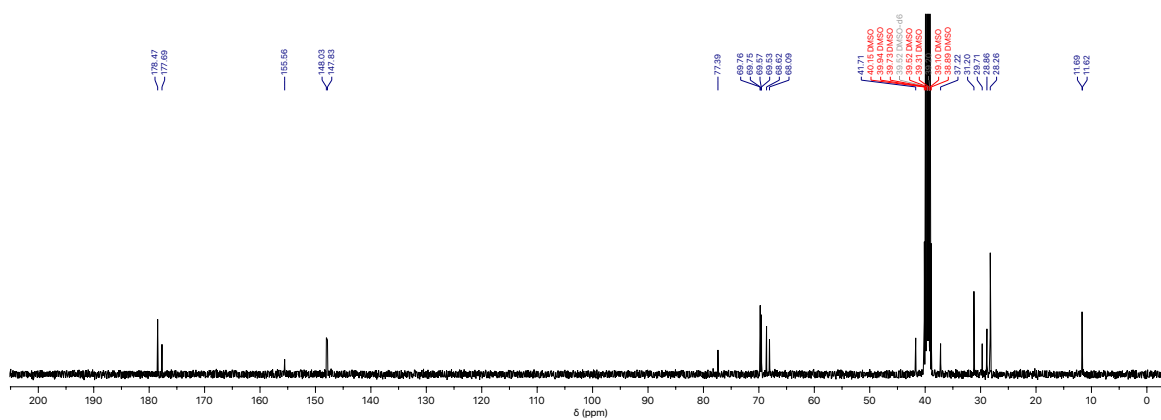

Figure S36.  $^{13}\text{C}\{^1\text{H}\}$  NMR (101 MHz,  $\text{DMSO-d}_6$ , 298 K) spectrum of compound **12**

hoQEx9217 #41-48 RT: 0.39-0.45 AV: 4 SB: 26 0.03-0.24 , 0.70-0.95 NL: 1.03E9  
T: FTMS + p ESI Full ms [100.0000-1500.0000]

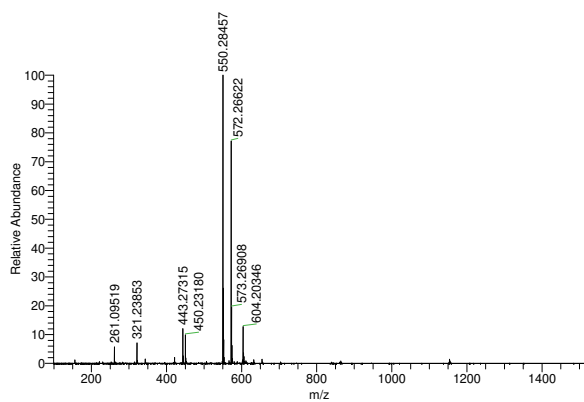

hoQEx9217 #41-47 RT: 0.39-0.45 AV: 4 SB: 26 0.03-0.24 , 0.70-0.95 NL: 1.03E9  
T: FTMS + p ESI Full ms [100.0000-1500.0000]

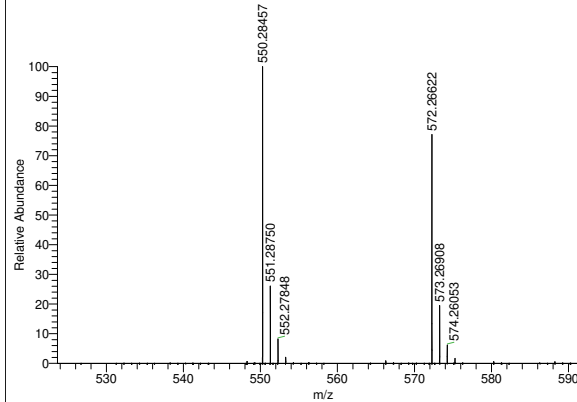

Figure S37. HR-ESI-MS spectrum of compound **12**

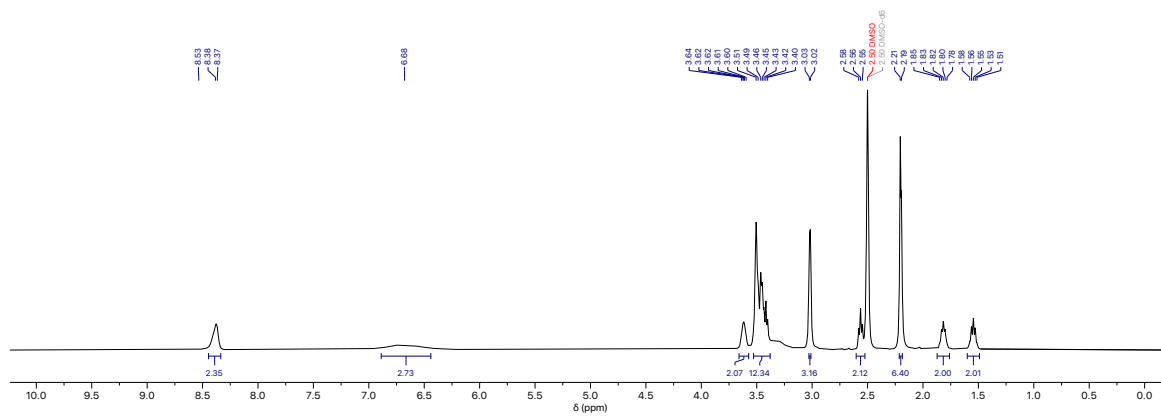

Figure S38.  $^1\text{H}$  NMR (400 MHz, DMSO- $d_6$ , 298 K) spectrum of compound **13**

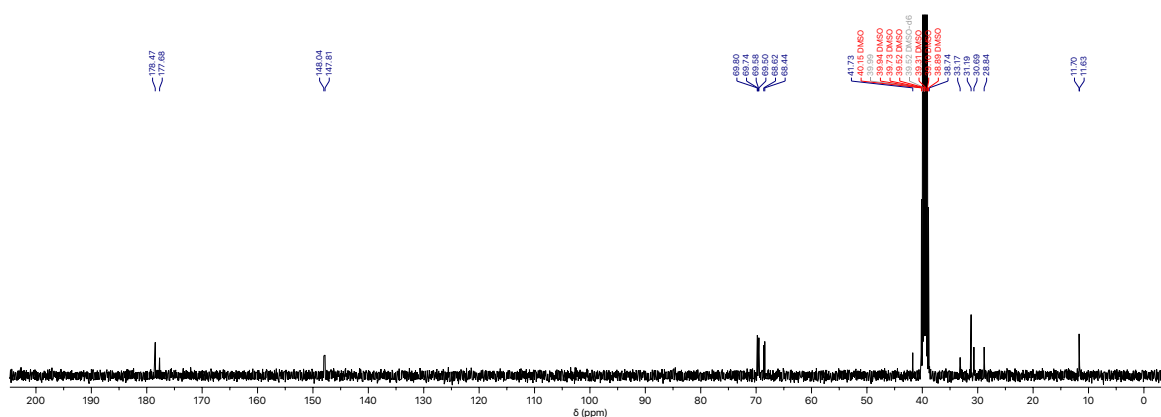

Figure S39.  $^{13}\text{C}\{^1\text{H}\}$  NMR (101 MHz, DMSO- $d_6$ , 298 K) spectrum of compound **13**

hoQEx9337 #38-50 RT: 0.38-0.47 AV: 6 SB: 24 0.04-0.25 , 0.73-0.97 NL: 2.91E9  
T: FTMS + p ESI Full ms [100.0000-1500.0000]

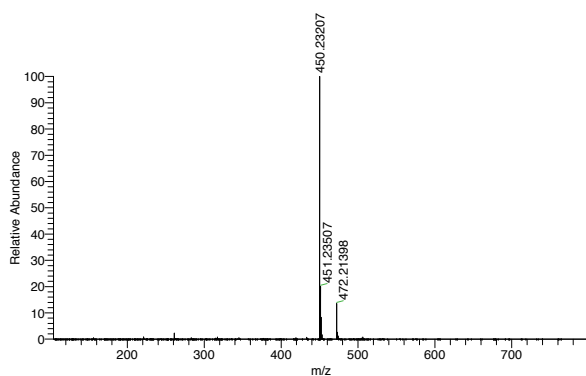

hoQEx9337 #38-50 RT: 0.38-0.47 AV: 6 SB: 24 0.04-0.25 , 0.73-0.97 NL: 2.91E9  
T: FTMS + p ESI Full ms [100.0000-1500.0000]

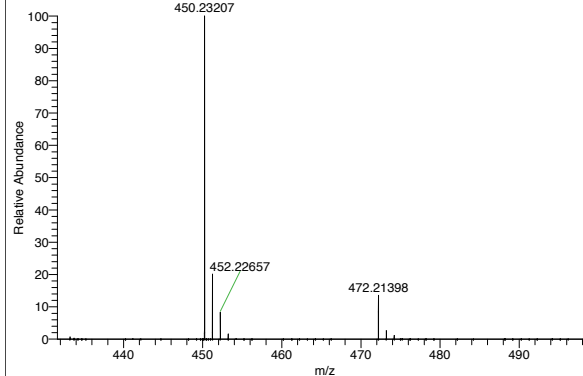

Figure S40. HR-ESI-MS spectrum of compound **13**

20\_hoQEx\_0372 #35-58 RT: 0.34-0.56 AV: 12 SB: 25 0.03-0.24 , 0.70-0.95 NL: 1.42E8  
T: FTMS + p ESI Full lock ms [100.0000-1500.0000]

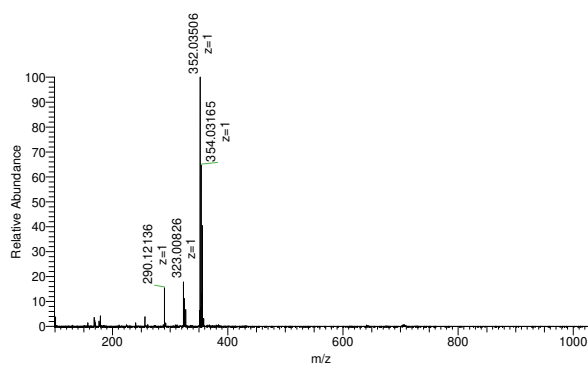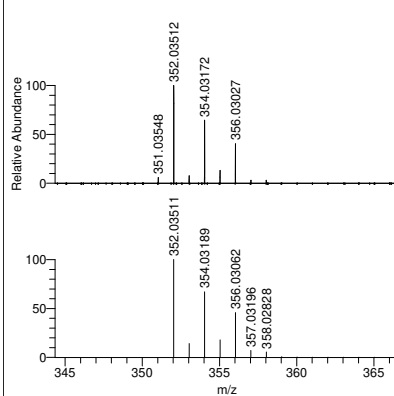

NL:  
1.23E8  
20\_hoQEx\_0372#34-67 RT:  
0.34-0.65 AV: 17 SB: 25  
0.03-0.24 , 0.70-0.95 T: FTMS +  
p ESI Full lock ms  
[100.0000-1500.0000]

NL:  
3.87E5  
C<sub>9</sub>H<sub>18</sub>N<sub>7</sub>S<sub>2</sub>Zn:  
C<sub>9</sub>H<sub>18</sub>N<sub>7</sub>S<sub>2</sub>Zn  
c (gss, s (p:40)(Val) Chrg 1  
R: 70000 Res .Pwr . @FWHM

**Figure S41.** HR-ESI-MS spectrum of compound Zn-6

20\_hoQEx\_0371 #35-58 RT: 0.34-0.56 AV: 12 SB: 26 0.03-0.24 , 0.70-0.95 NL: 3.39E8  
T: FTMS + p ESI Full lock ms [100.0000-1500.0000]

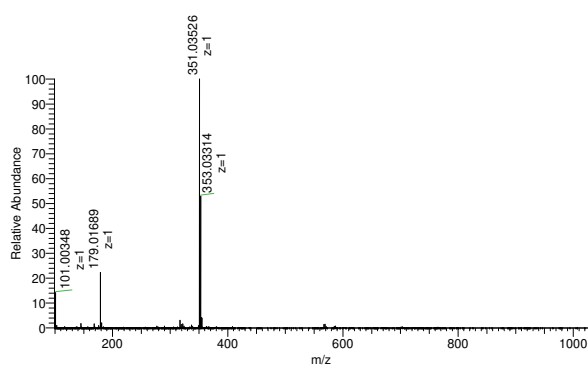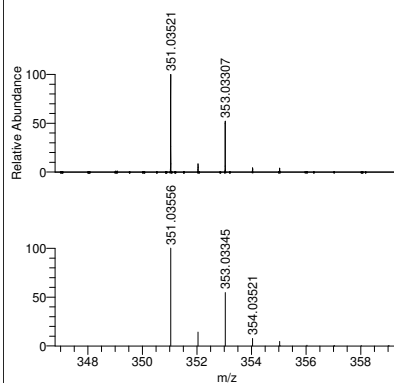

NL:  
2.51E8  
20\_hoQEx\_0371#34-67 RT:  
0.34-0.66 AV: 17 SB: 26  
0.03-0.24 , 0.70-0.95 T: FTMS +  
p ESI Full lock ms  
[100.0000-1500.0000]

NL:  
5.50E5  
C<sub>9</sub>H<sub>18</sub>N<sub>7</sub>S<sub>2</sub>Cu:  
C<sub>9</sub>H<sub>18</sub>N<sub>7</sub>S<sub>2</sub>Cu  
c (gss, s (p:40)(Val) Chrg 1  
R: 70000 Res .Pwr . @FWHM

**Figure S42.** HR-ESI-MS spectrum of compound Cu-6

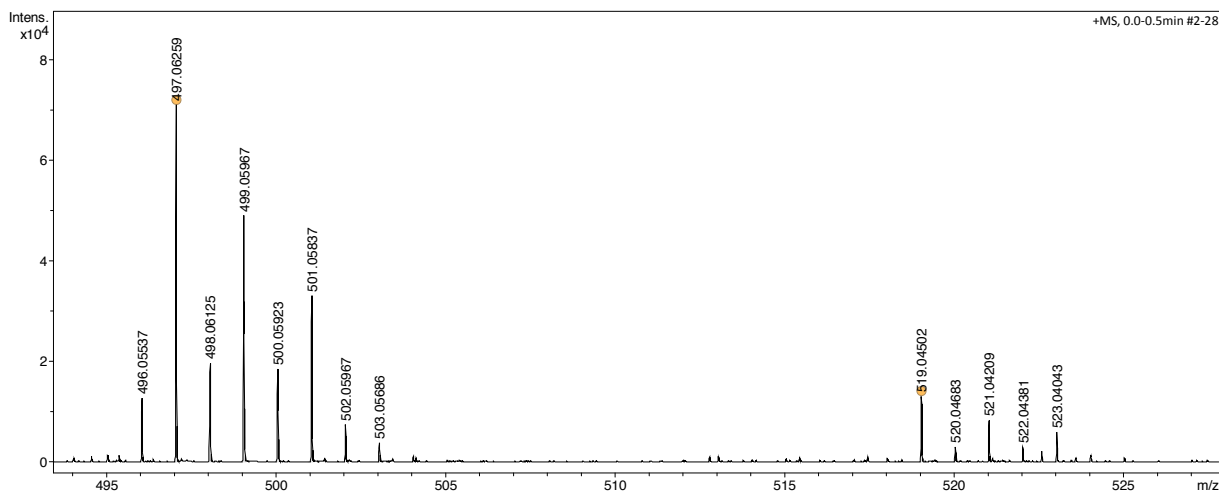

**Figure S43.** HR-ESI-MS spectrum of compound Zn-7

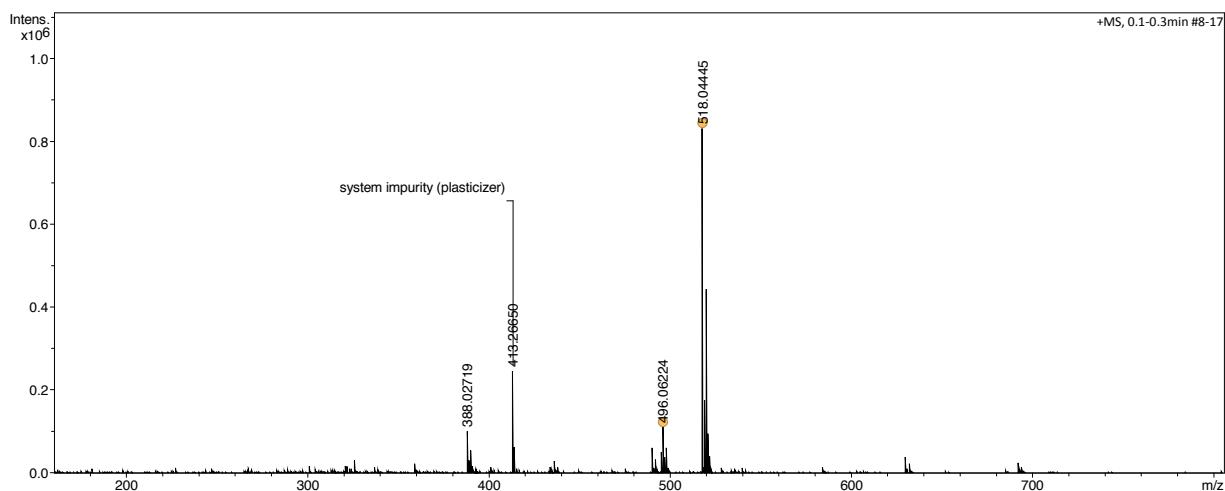

**Figure S44.** HR-ESI-MS spectrum of compound Cu-7

21\_hoQEx\_0150 #37-49 RT: 0.37-0.48 AV: 7 SB: 23 0.04-0.25 , 0.73-0.97 NL: 6.85E7  
T: FTMS + p ESI Full lock ms [100.0000-1500.0000]

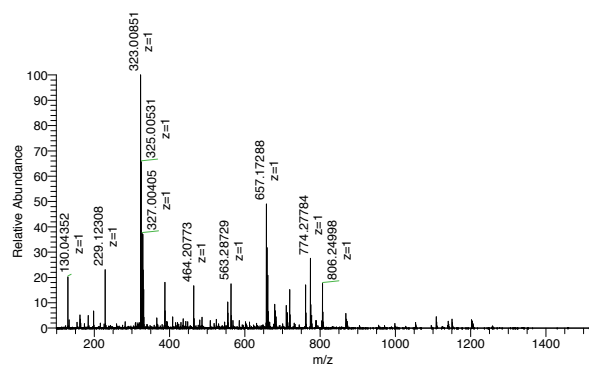

21\_hoQEx\_0150 #37-49 RT: 0.37-0.48 AV: 7 SB: 23 0.04-0.25 , 0.73-0.97 NL: 3.36E7  
T: FTMS + p ESI Full lock ms [100.0000-1500.0000]

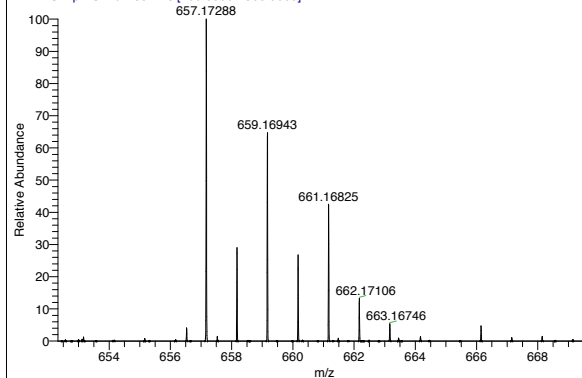

**Figure S45.** HR-ESI-MS spectrum of compound Zn-8

21\_hoQEx\_0149 #37-49 RT: 0.37-0.48 AV: 7 SB: 23 0.04-0.25 , 0.73-0.97 NL: 2.33E7  
T: FTMS + p ESI Full lock ms [100.0000-1500.0000]

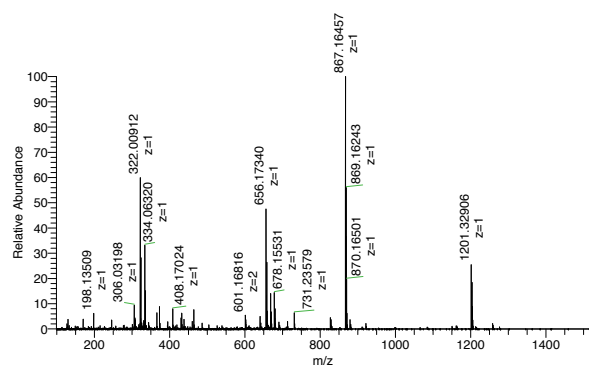

21\_hoQEx\_0149 #37-49 RT: 0.37-0.48 AV: 7 SB: 23 0.04-0.25 , 0.73-0.97 NL: 1.11E7  
T: FTMS + p ESI Full lock ms [100.0000-1500.0000]

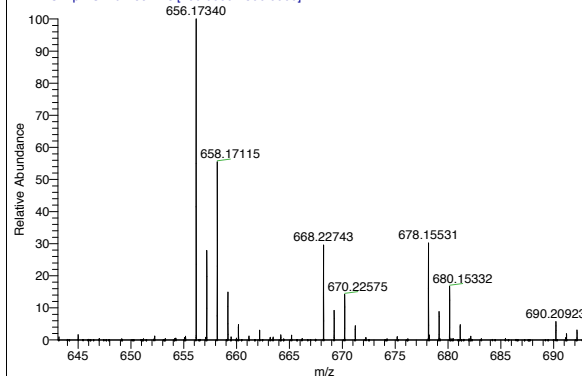

**Figure S46.** HR-ESI-MS spectrum of compound Cu-8

## Photochemical activation

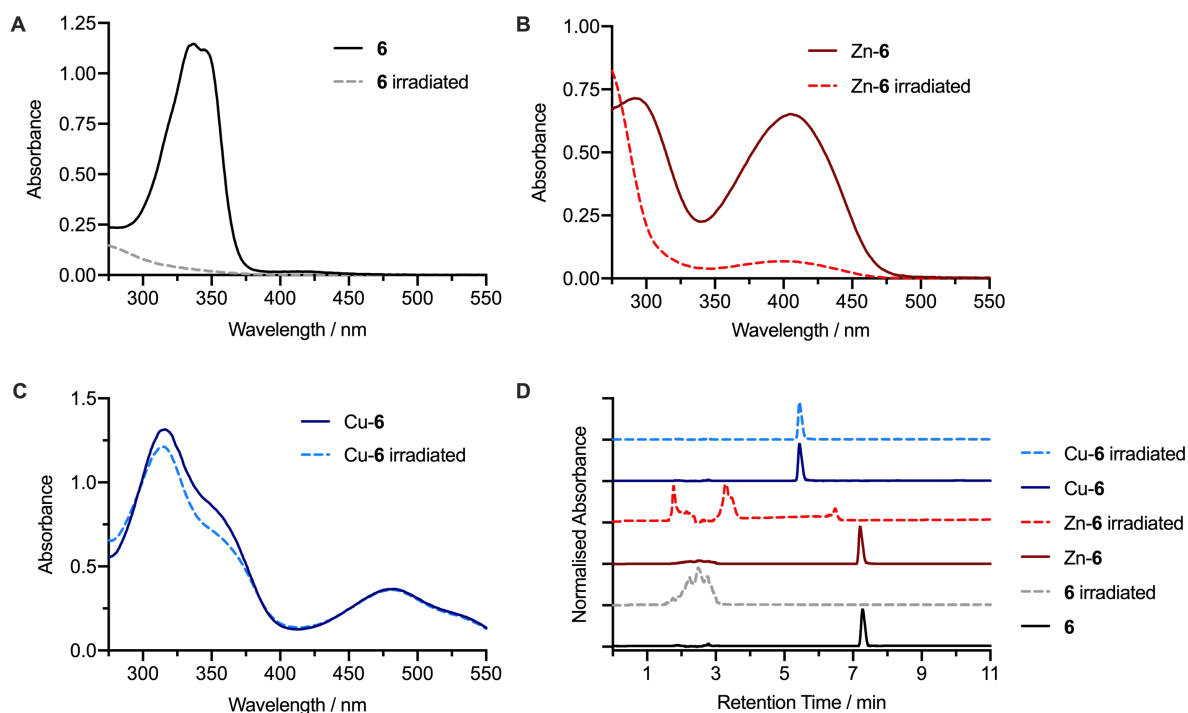

**Figure S47.** Irradiation stability for compound **6** (black: before; and grey: after irradiation) and corresponding metal complexes Zn-**6** (dark red: before; and red: after irradiation) and Cu-**6** (dark blue: before; and blue: after irradiation) in EtOH, before and after irradiation at 365 nm for 15 mins at pH 4.4. Electronic absorption spectra of (A) compound **6**, (B) Zn-**6**, (C) Cu-**6**, and (D) reverse-phase HPLC data ( $\lambda = 254$  nm) for compounds **6**, Zn-**6**, and Cu-**6**.

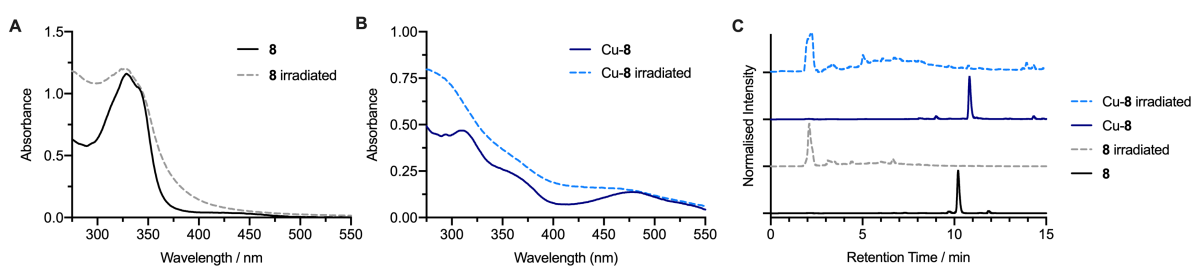

**Figure S48.** Photochemical degradation of compound **8** (black: before; and grey: after irradiation) and Cu-**8** (dark blue: before; and blue: after irradiation) in EtOH, before and after irradiation at 365 nm for 15 mins at pH 4.4. Electronic absorption spectra of (A) compound **8**, (B) Cu-**8**, and (C) reverse-phase HPLC data ( $\lambda = 254$  nm) for compounds **8**, Zn-**8**, and Cu-**8**.

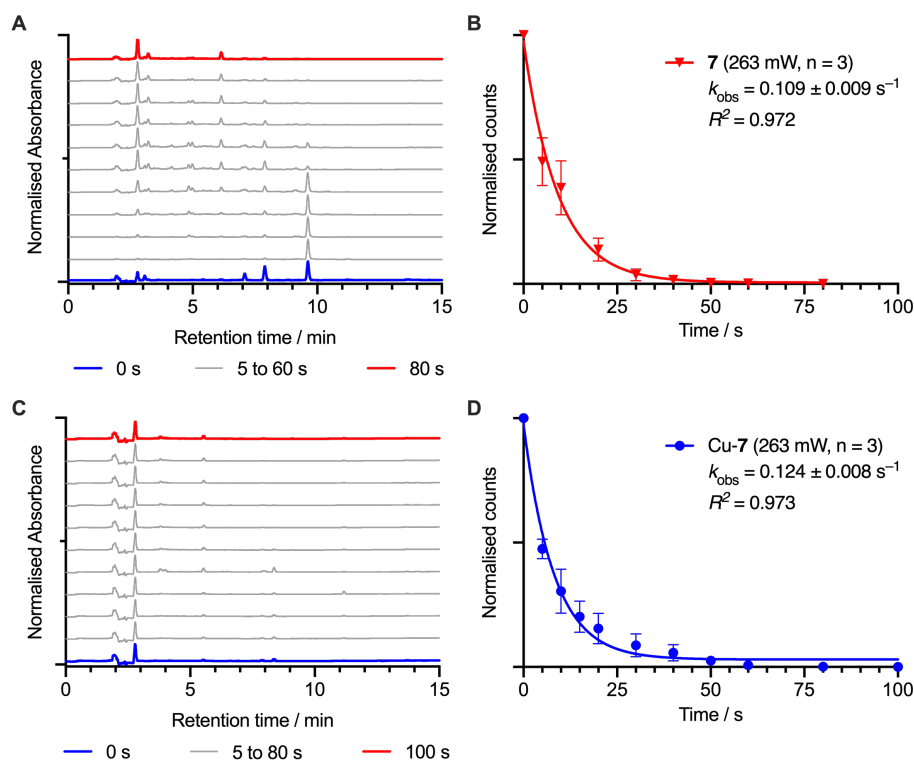

**Figure S49.** Photochemical activation kinetics measured by HPLC analysis during the photolysis of solutions of H<sub>2</sub>ATSM/en-ArN<sub>3</sub> (7) and Cu-7 in H<sub>2</sub>O at 365 nm for up to 100 seconds at room temperature. (A) Stack plots showing the change in the reverse-phase HPLC chromatograms of (A) 7, and (C) Cu-7 versus irradiation time. The corresponding kinetic plots produced from integration and normalisation of the peak intensity associated with the starting materials are shown for (B) 7, and (D) Cu-7. All data points are the mean (with error bars representing 1 standard deviation) derived from independent measurements that were performed in triplicate. Data were fitted with a mono-exponential function to derive the experimentally observed first-order rate constants,  $k_{\text{obs}} / \text{s}^{-1}$ , for photoinduced degradation.

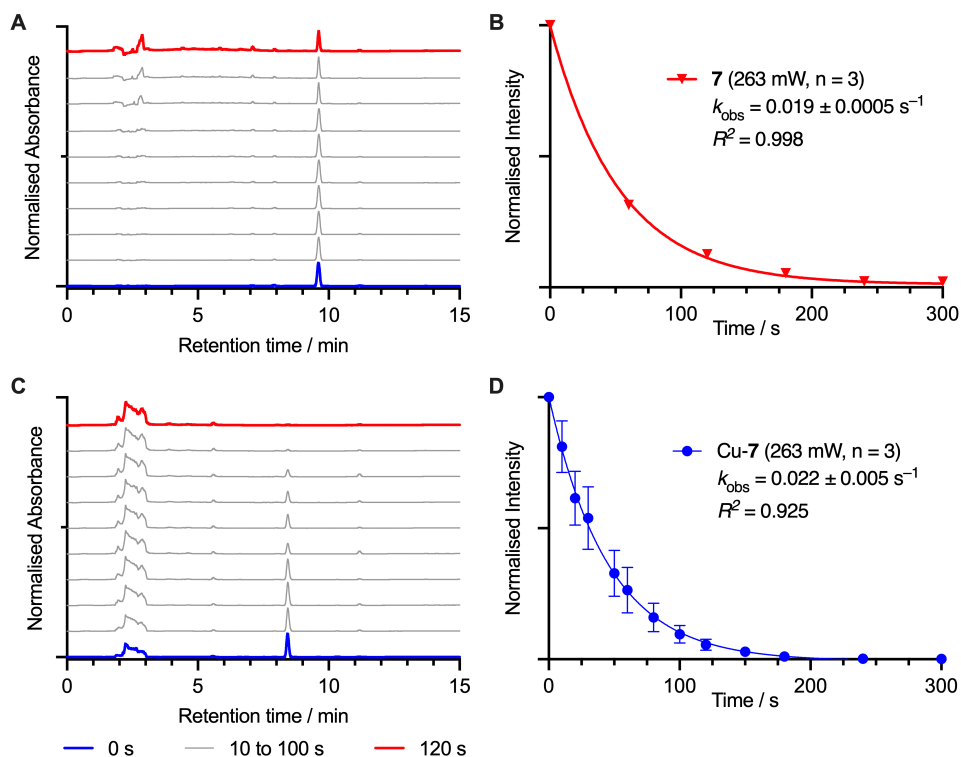

**Figure S50.** Photochemical activation kinetics measured by HPLC analysis during the photolysis of solutions of H<sub>2</sub>ATSM/en-ArN<sub>3</sub> (7) and Cu-7 in DMF at 365 nm for up to 120 seconds at room temperature. (A) Stack plots showing the change in the reverse-phase HPLC chromatograms of (A) 7, and (C) Cu-7 *versus* irradiation time. The corresponding kinetic plots produced from integration and normalisation of the peak intensity associated with the starting materials are show for (B) 7, and (D) Cu-7. All data points are the mean (with error bars representing 1 standard deviation) derived from independent measurements that were performed in triplicate. Data were fitted with a mono-exponential function to derive the experimentally observed first-order rate constants,  $k_{\text{obs}} / \text{s}^{-1}$ , for photoinduced degradation.



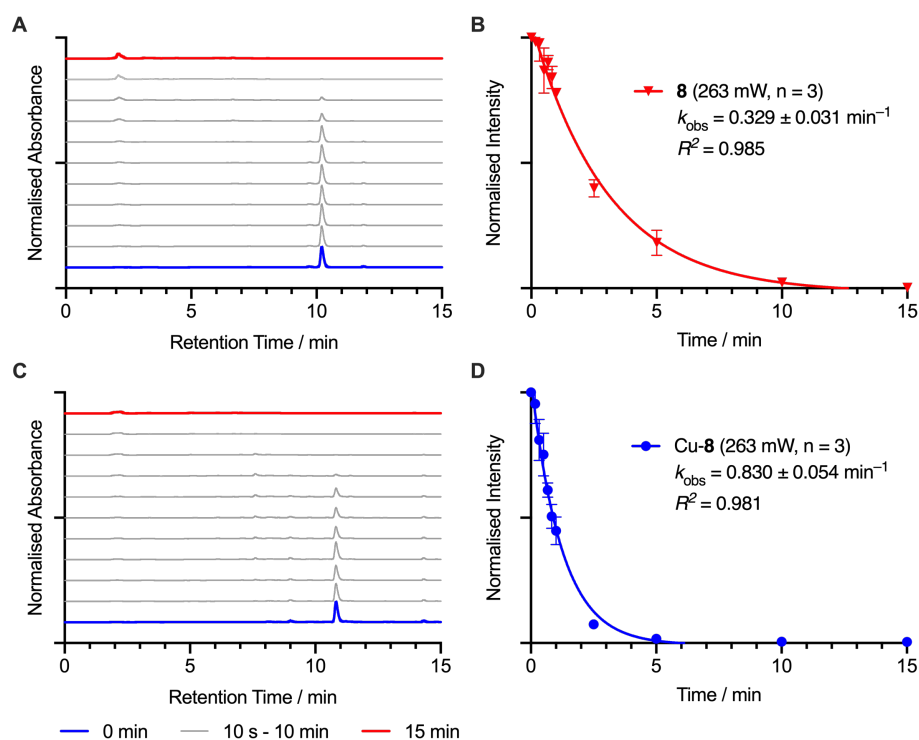

**Figure S51.** Photochemical activation kinetics measured by HPLC analysis during the photolysis of solutions of H<sub>2</sub>ATSM/en-PEG<sub>3</sub>-ArN<sub>3</sub> (**8**) and Cu-**8** in EtOH at 365 nm for up to 900 seconds at room temperature. (A) Stack plots showing the change in the reverse-phase HPLC chromatograms of (A) **8**, and (C) Cu-**8** versus irradiation time. The corresponding kinetic plots produced from integration and normalisation of the peak intensity associated with the starting materials are shown for (B) **8**, and (D) Cu-**8**. All data points are the mean (with error bars representing 1 standard deviation) derived from independent measurements that were performed in triplicate. Data were fitted with a mono-exponential function to derive the experimentally observed first-order rate constants,  $k_{\text{obs}} / \text{s}^{-1}$ , for photoinduced degradation.

## $^{64}\text{Cu}$ -Radiolabelling of $\text{H}_2\text{ATSM/en-ArN}_3$ derivatives

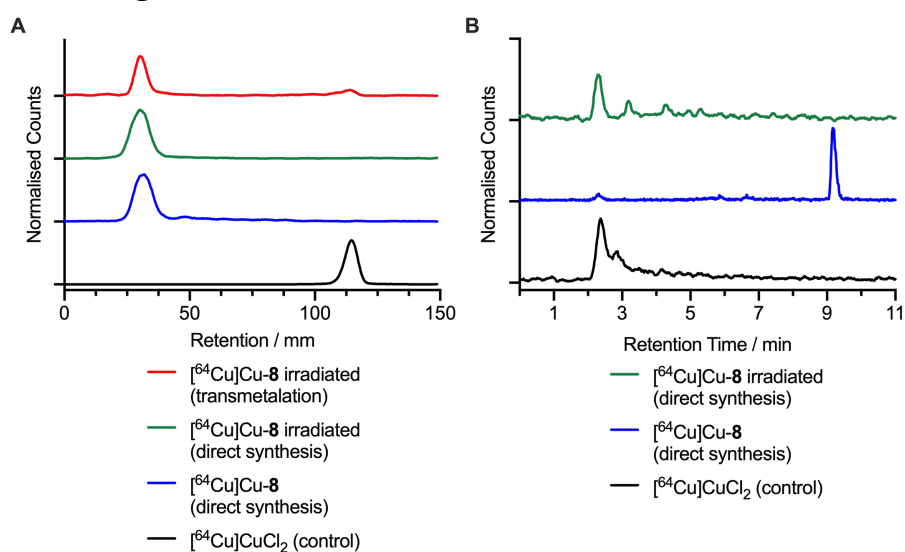

**Figure S52.** Radiochemical characterisation of  $^{64}\text{Cu}$ ]Cu-8. (A) Radio-iTLC chromatograms developed in 50 mM DTPA pH7.4 of  $^{64}\text{Cu}$ ]Cu-8 produced by direct synthesis from **8** (blue trace), as well as the sample of the reaction mixture measured after irradiation of  $^{64}\text{Cu}$ ]Cu-8 at 365 nm for 15 minutes from either direct synthesis (green trace) or transmetalation (red trace). The profile of  $^{64}\text{Cu}$ ]CuCl<sub>2</sub> as a control is shown in the black trace. (B) Radio-HPLC chromatograms of the reaction mixtures of  $^{64}\text{Cu}$ ]Cu-8 produced by direct synthesis (blue radiotrace) and after irradiation (green radiotrace), as well as the elution profile of ‘free’  $^{64}\text{Cu}^{2+}$  ions (black radiotrace) shown as a control.

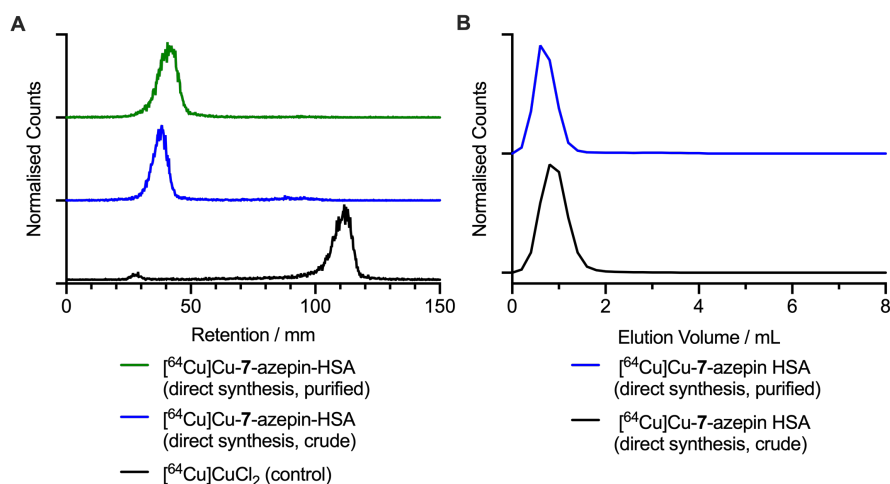

**Figure S53.** Radiochemical characterisation data of the  $[^{64}\text{Cu}]\text{Cu}$ -labelled protein conjugate  $[^{64}\text{Cu}]\text{CuATSM/en-azepin-HSA}$  *via* direct synthesis by (A) radio-iTLC (eluent: 50 mM DTPA pH7.4), and (B) radio-PD-10.

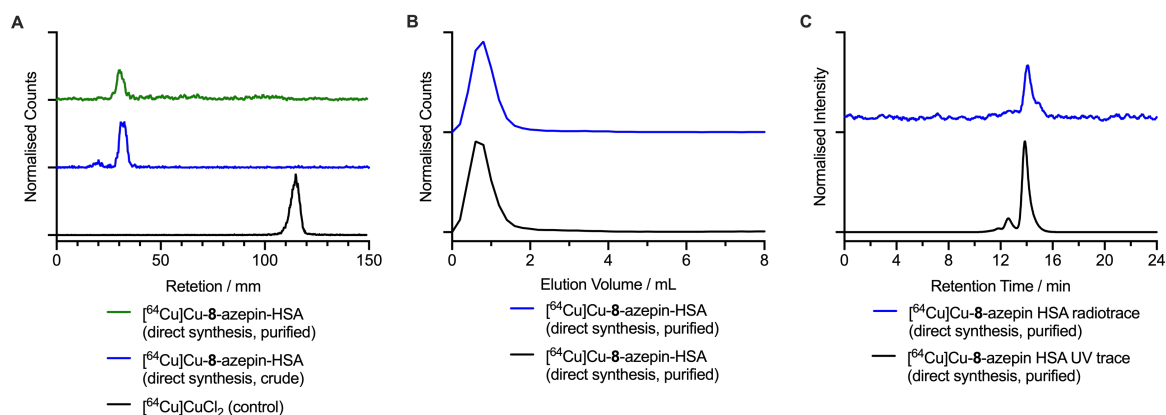

**Figure S54.** Radiochemical characterisation data of the  $[^{64}\text{Cu}]\text{Cu}$ -labelled protein conjugate  $[^{64}\text{Cu}]\text{CuATSM/en-PEG}_3\text{-azepin-HSA}$  *via* direct synthesis by (A) radio-iTLC and (B) radio-PD-10. Note: radio-iTLC chromatograms were developed by using a DTPA eluent (50 mM, pH7.4) where the  $[^{64}\text{Cu}]\text{CuCl}_2$  complex forms the  $[^{64}\text{Cu}][\text{Cu}(\text{DTPA})]^{3-}$  complex *in situ*.
